# Supplementary material for: An HLA Association With COVID-19 Vaccine Reactogenicity Correlates With Fewer SARS-CoV-2 Infections and Monocyte Activation
Source: Research Square preprint supplement (doi:10.21203/rs.3.rs-8282930/v1), 2025-12-17
Supplement: Supplementary file 1 [file 2f04f0bec6cb7f7108525fe2.xlsx]

## Sheet: supp1
Supplementary Table 1. Questionnaire for reporting side effects after COVID-19 vaccination in discovery cohort (N = 80,007).
S. No.	Questionnaire Item	Question no.	Description	Response	Response Coding	Column1
1	Q29-COVID-19 vaccination	Q29	Have you been vaccinated for COVID-19?	Yes	1
2	Q29-COVID-19 vaccination	Q29	Have you been vaccinated for COVID-19?	No	2
3	Q30-Vaccination Dates	Q30.1_1	Please list the type of vaccine and approximate dates (month and year) you received the vaccine. This includes any boosters) -- first dose	First dose	1-4
4	Q30-Vaccination Dates	Q30.1_2	Please list the type of vaccine and approximate dates (month and year) you received the vaccine. This includes any boosters)	Second dose	1-4	1: Moderna
5	Q30-Vaccination Dates	Q30.1_3	Please list the type of vaccine and approximate dates (month and year) you received the vaccine. This includes any boosters)	Booster 1	1-4	2: Pfizer
6	Q30-Vaccination Dates	Q30.1_4	Please list the type of vaccine and approximate dates (month and year) you received the vaccine. This includes any boosters)	Booster 2	1-4	3: Johnson & Johnson
7	Q30-Vaccination Dates	Q30.1_5	Please list the type of vaccine and approximate dates (month and year) you received the vaccine. This includes any boosters)	Booster 3	1-4	4: Other
8	Q30-Vaccination Dates	Q30.2_1	Please list the type of vaccine and approximate dates (month and year) you received the vaccine. This includes any boosters)	Month	1-12
9	Q30-Vaccination Dates	Q30.2_2	Please list the type of vaccine and approximate dates (month and year) you received the vaccine. This includes any boosters)	Month	1-12
10	Q30-Vaccination Dates	Q30.2_3	Please list the type of vaccine and approximate dates (month and year) you received the vaccine. This includes any boosters)	Month	1-12
11	Q30-Vaccination Dates	Q30.2_4	Please list the type of vaccine and approximate dates (month and year) you received the vaccine. This includes any boosters)	Month	1-12
12	Q30-Vaccination Dates	Q30.2_5	Please list the type of vaccine and approximate dates (month and year) you received the vaccine. This includes any boosters)	Month	1-12
13	Q30-Vaccination Dates	Q30.3_1	Please list the type of vaccine and approximate dates (month and year) you received the vaccine. This includes any boosters)	Year	1-5	1: 2019, 2:2020, 3:2021, 4:2022, 5:2023
14	Q30-Vaccination Dates	Q30.3_2	Please list the type of vaccine and approximate dates (month and year) you received the vaccine. This includes any boosters)	Year	1-5
15	Q30-Vaccination Dates	Q30.3_3	Please list the type of vaccine and approximate dates (month and year) you received the vaccine. This includes any boosters)	Year	1-5
16	Q30-Vaccination Dates	Q30.3_4	Please list the type of vaccine and approximate dates (month and year) you received the vaccine. This includes any boosters)	Year	1-5
17	Q30-Vaccination Dates	Q30.3_5	Please list the type of vaccine and approximate dates (month and year) you received the vaccine. This includes any boosters)	Year	1-5
18	Q31-Vaccine Side Effects	Q31_1	Did you any point experience any of the following side effects folowing the vaccine?	No side effects (asymptomatic)	1
19	Q31-Vaccine Side Effects	Q31_2	Did you any point experience any of the following side effects folowing the vaccine?	Fever or chills	1
20	Q31-Vaccine Side Effects	Q31_3	Did you any point experience any of the following side effects folowing the vaccine?	Fatigue	1
21	Q31-Vaccine Side Effects	Q31_4	Did you any point experience any of the following side effects folowing the vaccine?	Muscle or body aches	1
22	Q31-Vaccine Side Effects	Q31_5	Did you any point experience any of the following side effects folowing the vaccine?	Headaches	1
23	Q31-Vaccine Side Effects	Q31_6	Did you any point experience any of the following side effects folowing the vaccine?	Congestion or runny nose	1
24	Q31-Vaccine Side Effects	Q31_7	Did you any point experience any of the following side effects folowing the vaccine?	Nausea or vomiting	1
25	Q31-Vaccine Side Effects	Q31_8	Did you any point experience any of the following side effects folowing the vaccine?	Other	1
26	Q31-Vaccine Side Effects	Q31_8_TEXT	Did you any point experience any of the following side effects folowing the vaccine?	Other-TEXT	text
27	Q32-Overall healt	Q32	How would you chaactertize your overall health?	Excellent	1
28	Q32-Overall healt	Q32	How would you chaactertize your overall health?	Good	2
29	Q32-Overall healt	Q32	How would you chaactertize your overall health?	Average	3
30	Q32-Overall healt	Q32	How would you chaactertize your overall health?	Poor	4
31	Q32-Overall healt	Q32	How would you chaactertize your overall health?	Terrible	5
32	Q33-Other medical conditions	Q33	Do you have any other medical conditions not listed on this survery that you would like to share?		text
33	Q34-Ancestry DNA test	Q34	Have you done any ancestry DNA testing (such as 23and Me, AncestryDNA, or FamilyTreeDNA, etc.)?	Yes	1
34	Q34-Ancestry DNA test	Q34	Have you done any ancestry DNA testing (such as 23and Me, AncestryDNA, or FamilyTreeDNA, etc.)?	No	2
35	Q34-Ancestry DNA test	Q34	Have you done any ancestry DNA testing (such as 23and Me, AncestryDNA, or FamilyTreeDNA, etc.)?	Prefer not to answer	3
36	Q35-DNA Data Share	Q35	Are you willing to share the data from that DNA test?	Yes, I am willing to share the data from my DNA test.	1
37	Q35-DNA Data Share	Q35	Are you willing to share the data from that DNA test?	No, I am not willing to share the data from my DNA test.	2

## Sheet: supp2
Supplementary Table 2a. Sociodemographic characteristics of discovery cohort (European ancestry, N = 50,535)
Participant Demographics	Vaccinated	Prior infection	Breakthroughs	Pfizer	Moderna	JJ*
Female (n [%])	39644[78.4]	22990[79.1]	19217[79.67]	20773[79.1]	14333[78.3]	2440[73.7]
Male (n [%])	10891[21.6]	6087[20.9]	4904[20.33]	5477[20.9]	3974[21.7]	872[26.3]
Age [Median]	39	39	38	39	39	40
Population (n[%])	50535	29077[57.53]	24121[47.73]	26250[51.94]	18307[36.22]	3312[6.55]
Supplementary Table 2b. Sociodemographic characteristics of individuals from different ancestries in discovery cohort (N = 57,938).
Ancestry	Vaccinated	Sex (n [%] )	Sex (n [%]
		Female	Male
African American	940	787 [83.72]	153 [16.28]
Asian or Pacific Islander	2176	1503 [69.07]	673 [30.92]
European	50535	39644 [78.44]	10891[21.56]
Hispanic	4287	3394 [79.16]	893 [20.84]
*Note : JJ refers to Johnson and Johnson Vaccines

## Sheet: supp3
Supplementary Table 3. Sociodemographic characteristics of replication cohort (European ancestry, N= 4,575).
Participant Demographics	Vaccinated	Pfizer	Moderna	JJ*
Female (n [%])	3633 [79.4]	1787 [80.7]	1190 [79.5]	151 [72.9]
Male (n [%])	942 [20.6]	428 [19.3]	307 [20.5]	56 [27.1]
Age [Median]	41	40	41	42
Population (n[%])	4575	2215[48.4]	1497[32.72]	207[45.24]
*Note: JJ refers to Johnson and Johnson Vaccines

## Sheet: supp4
Supplementary Table 4. Frequency of all the vaccine side effects observed in discovery cohort (European, N = 50,535).
Side effects	Count	Frequency [in %]
No side effects	13341	26.3995
Fever or chills	17998	35.6149
Fatigue	25109	49.6864
Muscle or body aches	27109	53.644
Headaches	12511	24.7571
Congestion or runny nose	1715	3.39369
Nausea or vomiting	1917	3.79341
Other	2973	5.88305

## Sheet: supp5
Supplementary Table 5. Results for association between HLA alleles and three or more systemic vaccine side effects in the discovery cohort (European, N = 50,535; alleles that passed the Bonferroni correction, P value < 4.67×10-4, are significant).
HLA allele	estimate	std.error	odds ratio	lower limit	upper limit	p-values	negative log p-values
A*02:01	-0.0579851	0.0154684	0.943664	0.915483	0.972712	0.000177818	3.75002
A*02:02	0.566064	0.228227	1.76132	1.12608	2.75492	0.0131283	1.88179
A*02:05	0.0927111	0.0663031	1.09714	0.963442	1.2494	0.162025	0.790417
A*02:06	-0.0754555	0.163943	0.927321	0.67248	1.27874	0.645333	0.190216
A*02:07	-0.0350151	0.606192	0.965591	0.294301	3.16807	0.953938	0.0204799
A*02:08	1.38934	0.870329	4.01221	0.728693	22.0913	0.110413	0.956981
A*02:13	-0.670908	1.12091	0.511244	0.0568186	4.60009	0.549481	0.260047
A*02:17	0.0732572	0.271858	1.07601	0.631546	1.83327	0.787569	0.103711
A*02:20	-1.31234	0.757315	0.269189	0.0610124	1.18768	0.0831161	1.08031
A*02:22	0.910139	0.641981	2.48467	0.705997	8.74448	0.156277	0.806105
A*02:24	-2.10793	1.02851	0.121489	0.0161827	0.912053	0.0404127	1.39348
A*02:27	0.244742	1.26673	1.27729	0.106667	15.295	0.846796	0.0722211
A*02:30	-0.100666	0.458158	0.904235	0.368374	2.21959	0.826089	0.0829731
A*02:35	0.0430234	0.715017	1.04396	0.257069	4.23955	0.952019	0.0213542
A*03:01	0.308118	0.0193838	1.36086	1.31013	1.41356	6.79226e-57	56.168
A*03:02	-0.103695	0.130175	0.9015	0.698487	1.16352	0.425694	0.370902
A*03:05	0.640779	1.43469	1.89796	0.11404	31.5875	0.65514	0.183666
A*03:07	-0.102791	1.22626	0.902316	0.081573	9.98092	0.933196	0.0300272
A*11:01	-0.0469386	0.0291533	0.954146	0.901154	1.01025	0.107384	0.96906
A*11:05	-0.129023	0.837737	0.878954	0.170165	4.54007	0.877599	0.0567037
A*11:06	0.300807	1.24298	1.35095	0.118193	15.4413	0.808777	0.0921713
A*11:09	-0.47474	1.15953	0.622047	0.0640936	6.03714	0.682227	0.166071
A*23:01	0.268742	0.0466697	1.30832	1.19395	1.43364	8.49283e-09	8.07095
A*24:02	-0.0604966	0.0243543	0.941297	0.89742	0.987319	0.0129909	1.88636
A*24:03	-0.0845813	0.150661	0.918897	0.683946	1.23456	0.574523	0.240692
A*24:07	0.0624728	0.698248	1.06447	0.270876	4.18305	0.928708	0.0321209
A*24:32	0.115886	1.22824	1.12287	0.101119	12.4688	0.92483	0.033938
A*24:81	2.03653	1.12087	7.66399	0.851824	68.954	0.0692295	1.15971
A*24:178	0.677163	1.41428	1.96828	0.123092	31.4737	0.632078	0.199229
A*25:01	0.0365014	0.0466977	1.03718	0.94646	1.13659	0.434419	0.362091
A*26:01	0.0636537	0.0392191	1.06572	0.986871	1.15088	0.104583	0.980537
A*26:08	0.117626	0.213287	1.12482	0.740509	1.70859	0.581296	0.235602
A*26:09	0.874881	1.4468	2.39859	0.14074	40.8783	0.545377	0.263303
A*26:15	0.125138	1.24772	1.1333	0.0982347	13.0746	0.920112	0.0361595
A*29:01	-0.0316915	0.127309	0.968805	0.754865	1.24338	0.803412	0.0950616
A*29:02	0.242984	0.0362716	1.27505	1.18755	1.36899	2.09822e-11	10.6781
A*29:10	0.409372	0.650875	1.50587	0.420486	5.39292	0.529378	0.276234
A*29:12	0.604397	1.4174	1.83015	0.113754	29.4445	0.669808	0.17405
A*30:01	-0.0982624	0.062209	0.906411	0.802365	1.02395	0.114209	0.942298
A*30:02	-0.0862286	0.074706	0.917384	0.792429	1.06204	0.248402	0.604845
A*30:04	0.0239627	0.182775	1.02425	0.715855	1.46551	0.895693	0.0478409
A*31:01	-0.0864409	0.0429319	0.91719	0.843169	0.997708	0.0440683	1.35587
A*32:01	-0.124645	0.0376531	0.88281	0.820005	0.950426	0.000931767	3.03069
A*32:04	0.013105	0.713025	1.01319	0.250468	4.09855	0.985336	0.00641558
A*32:07	-0.0436274	1.22616	0.957311	0.0865607	10.5873	0.971617	0.0125049
A*32:17	0.628652	1.41491	1.87508	0.117119	30.0201	0.656821	0.182553
A*33:01	-0.0780832	0.0765291	0.924887	0.79606	1.07456	0.307583	0.512038
A*33:03	0.171297	0.121967	1.18684	0.934486	1.50735	0.160184	0.795381
A*33:05	-0.284073	0.446542	0.752712	0.313707	1.80606	0.524671	0.280113
A*34:02	0.0953487	0.215778	1.10004	0.720668	1.67913	0.658574	0.181396
A*36:01	-0.813018	0.778472	0.443518	0.0964411	2.03967	0.296312	0.528251
A*66:01	-0.32405	0.112855	0.723214	0.5797	0.902258	0.00408671	2.38863
A*68:01	-0.0501073	0.0393548	0.951127	0.88052	1.0274	0.202941	0.692631
A*68:02	-0.149575	0.075891	0.861074	0.742063	0.999171	0.0487328	1.31218
A*68:25	0.705109	1.42208	2.02407	0.124659	32.8643	0.620015	0.207598
A*69:01	-0.373486	0.184508	0.688331	0.479447	0.98822	0.0429472	1.36706
A*74:01	-0.259909	0.483327	0.771122	0.299025	1.98856	0.59075	0.228596
A*74:03	0.0988703	0.39894	1.10392	0.505073	2.41281	0.804264	0.0946014
A*74:06	0.434622	1.41431	1.54438	0.0965753	24.6969	0.758613	0.11998
A*80:01	0.436842	0.496658	1.54781	0.584728	4.09715	0.379096	0.42125
B*07:02	0.0145159	0.0202134	1.01462	0.97521	1.05563	0.472675	0.325438
B*07:03	0.889045	1.03126	2.43281	0.322316	18.3626	0.388634	0.410459
B*07:04	-0.549161	0.430062	0.577434	0.248557	1.34146	0.201625	0.695456
B*07:05	0.077657	0.12322	1.08075	0.848866	1.37598	0.528543	0.27692
B*07:07	0.114152	1.22728	1.12092	0.101134	12.4238	0.925894	0.0334388
B*07:09	0.192028	1.2318	1.21171	0.108359	13.5497	0.876118	0.0574374
B*07:10	0.762509	0.822704	2.14365	0.427419	10.7511	0.354013	0.45098
B*07:22	-0.427211	1.15699	0.652326	0.0675482	6.29964	0.711947	0.147553
B*08:01	-0.263078	0.0223539	0.768682	0.73573	0.803109	5.65501e-32	31.2476
B*13:01	0.291984	0.735829	1.33908	0.31656	5.66445	0.691508	0.160203
B*13:02	0.0104085	0.0445732	1.01046	0.925932	1.10271	0.815362	0.0886497
B*14:01	0.0369258	0.0673951	1.03762	0.90922	1.18414	0.58376	0.233765
B*14:02	0.0206111	0.0402965	1.02082	0.943301	1.10472	0.609011	0.215375
B*14:03	0.410369	1.41432	1.50737	0.0942599	24.1054	0.771699	0.112552
B*14:06	0.786319	1.44097	2.1953	0.130291	36.9889	0.585281	0.232636
B*15:01	0.215242	0.0280867	1.24016	1.17374	1.31035	1.80934e-14	13.7425
B*15:03	-0.0832101	0.19681	0.920158	0.625654	1.35329	0.672445	0.172343
B*15:07	0.0575771	0.243457	1.05927	0.657311	1.70703	0.813046	0.089885
B*15:08	-0.440402	0.512681	0.643777	0.235686	1.75848	0.39033	0.408568
B*15:09	-0.238273	0.357491	0.787987	0.391036	1.5879	0.505082	0.296638
B*15:10	0.0812258	0.356933	1.08462	0.538826	2.18325	0.819984	0.0861948
B*15:16	-0.303894	0.365914	0.737939	0.360204	1.5118	0.406253	0.391203
B*15:17	-0.17284	0.115028	0.841272	0.671464	1.05402	0.132946	0.876325
B*15:18	0.0137448	0.138241	1.01384	0.773207	1.32936	0.9208	0.0358347
B*15:23	0.883753	1.00328	2.41997	0.338689	17.2909	0.378391	0.422059
B*15:24	0.231782	0.320789	1.26085	0.672358	2.36441	0.469964	0.327935
B*15:29	0.0634275	1.2268	1.06548	0.0962211	11.7984	0.958767	0.0182871
B*15:30	0.919763	1.41744	2.50869	0.15592	40.364	0.516408	0.287007
B*15:33	0.361981	0.92059	1.43617	0.236366	8.72627	0.694167	0.158536
B*15:34	0.951016	0.769608	2.58834	0.572687	11.6983	0.216565	0.664413
B*15:39	1.49207	0.92246	4.44628	0.729094	27.1151	0.105773	0.975626
B*15:45	-0.942655	1.0887	0.389592	0.04612	3.29103	0.386571	0.412771
B*15:71	0.185488	0.740749	1.20381	0.28185	5.14156	0.802273	0.0956779
B*15:132	1.30325	1.42702	3.68125	0.224541	60.3527	0.3611	0.442373
B*15:153	0.59227	1.42269	1.80809	0.111225	29.3925	0.677188	0.16929
B*18:01	-0.0961964	0.0337848	0.908286	0.850089	0.970467	0.00440885	2.35567
B*18:03	-0.440805	0.4074	0.643518	0.289584	1.43003	0.279254	0.554
B*18:04	0.159238	0.738162	1.17262	0.275943	4.98302	0.829204	0.0813386
B*18:05	-0.0803929	0.870712	0.922754	0.167464	5.08453	0.926436	0.0331847
B*18:13	1.33025	1.22821	3.782	0.340599	41.9952	0.278774	0.554748
B*27:01	1.30191	1.22993	3.67631	0.329971	40.959	0.289816	0.537877
B*27:02	-0.233658	0.114574	0.791633	0.632407	0.990949	0.0414142	1.38285
B*27:03	0.60969	0.583316	1.83986	0.586484	5.77184	0.295924	0.528819
B*27:05	-0.0680384	0.0363778	0.934225	0.869933	1.00327	0.0614386	1.21156
B*27:07	-0.029225	0.427703	0.971198	0.419991	2.24583	0.945523	0.024328
B*27:08	-0.0523417	0.551524	0.949005	0.32196	2.79727	0.924391	0.0341442
B*27:09	-1.01453	1.08302	0.362572	0.0434018	3.02887	0.348881	0.457322
B*27:10	0.201086	0.63351	1.22273	0.353245	4.23238	0.750928	0.124402
B*27:12	0.20891	0.653487	1.23233	0.342349	4.43596	0.749207	0.125398
B*27:14	0.227247	0.710526	1.25514	0.311803	5.05247	0.749097	0.125462
B*35:01	0.0954364	0.0299263	1.10014	1.03747	1.1666	0.00142743	2.84545
B*35:02	0.0670999	0.067274	1.0694	0.937295	1.22013	0.318564	0.496803
B*35:03	0.0757764	0.0519251	1.07872	0.974338	1.19429	0.144471	0.840219
B*35:08	-0.206609	0.107844	0.813338	0.658374	1.00478	0.0553885	1.25658
B*35:12	0.247438	0.631176	1.28074	0.371701	4.41294	0.695039	0.157991
B*35:17	1.29316	1.23745	3.64428	0.322311	41.2049	0.296013	0.528689
B*35:41	0.338686	0.576049	1.4031	0.453677	4.33943	0.556568	0.254482
B*37:01	-0.128047	0.0582409	0.879812	0.7849	0.986201	0.0279079	1.55427
B*38:01	-0.0957072	0.0476466	0.90873	0.827708	0.997683	0.0445699	1.35096
B*38:24	0.495255	1.41594	1.64092	0.102286	26.3243	0.72651	0.138758
B*39:01	-0.132915	0.0654634	0.87554	0.770109	0.995404	0.0423195	1.37346
B*39:05	-1.00841	1.08338	0.3648	0.0436382	3.0496	0.351957	0.45351
B*39:06	-0.046525	0.0896083	0.954541	0.800789	1.13781	0.603618	0.219238
B*39:10	0.694212	0.680067	2.00213	0.527968	7.59236	0.307349	0.512368
B*39:24	-0.320793	0.352421	0.725573	0.363659	1.44767	0.362689	0.440466
B*39:31	-0.345812	0.683343	0.707646	0.185414	2.70078	0.612815	0.21267
B*40:01	-0.0372414	0.0311788	0.963444	0.90633	1.02416	0.232304	0.633943
B*40:02	-0.163026	0.0631422	0.849569	0.750673	0.961494	0.00982632	2.00761
B*40:05	0.313354	1.41436	1.36801	0.085539	21.8782	0.824662	0.083724
B*40:06	0.124163	0.391969	1.1322	0.525137	2.44103	0.751421	0.124117
B*40:07	0.984044	1.41475	2.67525	0.167148	42.8182	0.486705	0.312734
B*41:01	-0.00189742	0.0981267	0.998104	0.823472	1.20977	0.984573	0.0067522
B*41:02	-0.268243	0.100301	0.764722	0.628241	0.930853	0.00748659	2.12572
B*42:01	0.172512	0.474871	1.18829	0.468493	3.01397	0.716394	0.144848
B*42:02	-0.152249	0.54386	0.858774	0.295758	2.49357	0.779522	0.108172
B*44:02	-0.0562851	0.0239859	0.94527	0.901859	0.99077	0.0189462	1.72248
B*44:03	0.277007	0.0304834	1.31918	1.24267	1.4004	1.01679e-19	18.9928
B*44:04	-0.170408	0.287523	0.843321	0.480008	1.48162	0.553398	0.256962
B*44:05	-0.0262381	0.120797	0.974103	0.768741	1.23433	0.828047	0.0819451
B*44:06	0.924145	1.02335	2.51971	0.339046	18.7259	0.366494	0.435933
B*44:09	0.610238	0.610616	1.84087	0.556232	6.09243	0.31761	0.498105
B*45:01	0.216697	0.0860507	1.24197	1.04921	1.47014	0.0117939	1.92834
B*46:01	0.40262	0.651535	1.49574	0.417117	5.36356	0.536604	0.270346
B*47:01	0.35724	0.1301	1.42938	1.10765	1.84455	0.00603485	2.21933
B*48:01	0.317331	0.295058	1.37346	0.770294	2.44892	0.282157	0.54951
B*49:01	0.163072	0.0523293	1.17712	1.06238	1.30426	0.00183151	2.73719
B*50:01	0.478103	0.0613375	1.61301	1.4303	1.81907	6.46002e-15	14.1898
B*50:02	0.51331	0.290866	1.67081	0.944795	2.95473	0.0776031	1.11012
B*51:01	0.130358	0.0307651	1.13924	1.07257	1.21004	2.26329e-05	4.64526
B*51:05	-0.185825	0.449677	0.830419	0.343973	2.0048	0.679431	0.167855
B*51:07	0.104798	0.299505	1.11049	0.617404	1.99736	0.72641	0.138818
B*51:08	-0.407538	0.222175	0.665286	0.430417	1.02832	0.0666075	1.17648
B*51:09	1.1004	0.244805	3.00535	1.86	4.85599	6.95736e-06	5.15756
B*51:19	0.822712	1.4145	2.27667	0.142315	36.4205	0.560818	0.251178
B*51:43	-0.438805	1.1603	0.644807	0.0663381	6.26752	0.705295	0.151629
B*52:01	-0.132459	0.0747392	0.875939	0.756579	1.01413	0.0763472	1.11721
B*53:01	-0.142454	0.118133	0.867227	0.687981	1.09317	0.227862	0.642328
B*54:01	0.87843	1.00769	2.40712	0.333994	17.3483	0.383355	0.416398
B*55:01	0.0498012	0.0498147	1.05106	0.95329	1.15886	0.317442	0.498336
B*56:01	0.106111	0.0856913	1.11195	0.94003	1.3153	0.215606	0.666338
B*57:01	-0.0985402	0.0376279	0.906159	0.841734	0.975515	0.00882382	2.05434
B*57:02	0.341296	0.307283	1.40677	0.770297	2.56914	0.266702	0.573973
B*57:03	0.26822	0.229362	1.30763	0.83416	2.04986	0.242236	0.615761
B*58:01	0.0168107	0.0772688	1.01695	0.874034	1.18324	0.827771	0.0820897
B*58:02	0.0535839	0.631574	1.05505	0.30596	3.63813	0.932387	0.0304038
B*73:01	-0.191495	0.316702	0.825724	0.443867	1.53609	0.545409	0.263277
B*78:01	-0.761787	1.11856	0.466831	0.0521225	4.18114	0.495843	0.304656
C*01:02	0.103661	0.0369065	1.10922	1.03182	1.19244	0.00497334	2.30335
C*01:32	-0.305792	1.15804	0.73654	0.0761119	7.12753	0.791733	0.101421
C*02:02	-0.0953898	0.0334359	0.909019	0.851357	0.970586	0.00433203	2.36331
C*02:26	0.640779	1.41436	1.89796	0.118675	30.3538	0.650511	0.186746
C*03:02	0.272287	0.134651	1.31296	1.00841	1.7095	0.0431583	1.36494
C*03:03	0.137909	0.0299304	1.14787	1.08247	1.21722	4.07236e-06	5.39015
C*03:04	0.0171915	0.0261673	1.01734	0.966478	1.07088	0.511191	0.291417
C*03:14	0.031134	0.629258	1.03162	0.300529	3.54125	0.960539	0.017485
C*03:19	1.50833	0.840456	4.51916	0.870255	23.4676	0.0727094	1.13841
C*03:40	0.212989	0.916263	1.23737	0.205381	7.45484	0.816186	0.088211
C*04:01	0.118396	0.0218678	1.12569	1.07846	1.17499	6.15737e-08	7.2106
C*04:03	0.966918	0.828288	2.62983	0.51865	13.3346	0.243061	0.614285
C*04:04	-0.23163	0.696243	0.79324	0.202652	3.10498	0.739372	0.131137
C*04:07	1.03256	1.44869	2.80823	0.164167	48.0375	0.475999	0.322394
C*05:01	-0.0352442	0.0243825	0.96537	0.92032	1.01262	0.148325	0.828786
C*05:10	0.608104	1.41657	1.83694	0.114364	29.5055	0.66772	0.175406
C*05:14	0.410369	1.41557	1.50737	0.0940296	24.1645	0.771895	0.112442
C*06:02	0.0361151	0.0232622	1.03678	0.990566	1.08514	0.120537	0.918879
C*07:01	-0.194658	0.0189788	0.823116	0.79306	0.854312	1.10557e-24	23.9564
C*07:02	0.005283	0.0195539	1.0053	0.967497	1.04457	0.787024	0.104012
C*07:04	-0.0561378	0.0530979	0.945409	0.851965	1.0491	0.290397	0.537008
C*07:05	0.701419	1.41428	2.01661	0.126114	32.2465	0.619926	0.20766
C*07:12	1.40761	1.23266	4.08618	0.364804	45.7695	0.253482	0.596053
C*07:27	0.1794	0.915863	1.1965	0.198753	7.20295	0.844704	0.0732957
C*07:36	0.446749	1.4147	1.56322	0.0976795	25.0171	0.752162	0.123689
C*07:46	-0.794835	1.12128	0.451656	0.0501597	4.06687	0.478409	0.320201
C*07:85	0.483128	1.42013	1.62114	0.100226	26.2215	0.733706	0.134478
C*07:234	0.878726	1.41507	2.40783	0.150346	38.5621	0.534616	0.271958
C*08:01	-0.366272	0.51685	0.693314	0.251755	1.90933	0.478534	0.320087
C*08:02	0.0145643	0.0352142	1.01467	0.947001	1.08718	0.679174	0.168019
C*08:03	0.49003	0.331719	1.63237	0.852026	3.12739	0.139609	0.855085
C*08:12	0.689291	1.41467	1.9923	0.124498	31.8821	0.626085	0.203367
C*08:53	0.713547	1.41592	2.04122	0.127243	32.745	0.614299	0.21162
C*12:02	-0.147681	0.0765619	0.862706	0.742493	1.00238	0.053742	1.26969
C*12:03	-0.0936836	0.0314651	0.910571	0.856111	0.968495	0.00290721	2.53652
C*12:05	1.89326	1.1574	6.64098	0.687124	64.1845	0.101884	0.991896
C*14:02	0.0792015	0.0629949	1.08242	0.956697	1.22467	0.208656	0.680569
C*14:03	0.626931	0.463479	1.87186	0.75466	4.64295	0.176163	0.754085
C*14:04	0.610493	1.00449	1.84134	0.257096	13.1878	0.543344	0.264925
C*15:02	0.0952334	0.0459486	1.09992	1.00519	1.20357	0.0382089	1.41784
C*15:04	0.167142	0.36236	1.18192	0.580955	2.40456	0.644612	0.190702
C*15:05	-0.00208521	0.11388	0.997917	0.798285	1.24747	0.985391	0.00639141
C*15:06	-0.762946	0.556585	0.466291	0.156633	1.38813	0.170449	0.768406
C*15:09	-0.393986	0.82342	0.674364	0.134272	3.38691	0.632312	0.199068
C*15:11	0.481444	0.508014	1.61841	0.59794	4.38045	0.343283	0.464347
C*16:01	0.278594	0.0359313	1.32127	1.23142	1.41768	8.93875e-15	14.0487
C*16:02	-0.117736	0.11791	0.88893	0.705507	1.12004	0.318022	0.497542
C*16:04	-0.129285	0.193524	0.878724	0.601342	1.28405	0.504099	0.297484
C*17:01	-0.120651	0.0725279	0.886343	0.768891	1.02174	0.0962091	1.01678
C*18:01	0.726284	0.374709	2.06738	0.991887	4.30903	0.0525915	1.27908
DRB1*01:01	0.0608038	0.0243247	1.06269	1.01321	1.11458	0.0124309	1.9055
DRB1*01:02	0.00910459	0.0573564	1.00915	0.901844	1.12922	0.873876	0.0585502
DRB1*01:03	0.0432404	0.0622513	1.04419	0.924251	1.17969	0.487299	0.312204
DRB1*03:01	-0.151236	0.0212959	0.859644	0.824501	0.896285	1.2327e-12	11.9091
DRB1*03:02	0.21776	0.398882	1.24329	0.568901	2.71711	0.585117	0.232758
DRB1*03:04	-0.257922	0.824853	0.772656	0.153411	3.89148	0.754518	0.122331
DRB1*03:05	0.701419	1.42011	2.01661	0.124681	32.6169	0.621363	0.206654
DRB1*04:01	0.021892	0.0243275	1.02213	0.97454	1.07205	0.368182	0.433938
DRB1*04:02	0.176175	0.0653544	1.19265	1.04925	1.35563	0.00702439	2.15339
DRB1*04:03	0.142046	0.073072	1.15263	0.998826	1.33012	0.0519047	1.28479
DRB1*04:04	0.00362735	0.0362433	1.00363	0.934812	1.07752	0.920278	0.0360809
DRB1*04:05	0.161732	0.0840133	1.17554	0.99707	1.38597	0.0542204	1.26584
DRB1*04:06	0.399957	0.318923	1.49176	0.798411	2.78722	0.209811	0.678172
DRB1*04:07	0.0351273	0.0657596	1.03575	0.9105	1.17823	0.593219	0.226785
DRB1*04:08	-0.0104817	0.102326	0.989573	0.809741	1.20934	0.918412	0.0369626
DRB1*04:09	1.01596	0.508356	2.76202	1.01978	7.48079	0.0456599	1.34047
DRB1*04:10	0.589134	0.771747	1.80243	0.39713	8.18054	0.445239	0.351407
DRB1*07:01	0.126788	0.0197591	1.13518	1.09205	1.18	1.3927e-10	9.85614
DRB1*07:05	0.798451	1.41637	2.2221	0.138397	35.678	0.572937	0.241893
DRB1*08:01	0.0551448	0.0461859	1.05669	0.965239	1.15681	0.232488	0.6336
DRB1*08:02	-0.131439	0.266216	0.876833	0.520366	1.47749	0.621498	0.20656
DRB1*08:03	0.00490741	0.146476	1.00492	0.754133	1.3391	0.973273	0.0117651
DRB1*08:04	-0.155315	0.15039	0.856145	0.637577	1.14964	0.30172	0.520396
DRB1*08:06	0.313537	0.523726	1.36826	0.490188	3.8192	0.549396	0.260115
DRB1*08:07	0.384055	1.23513	1.46823	0.130447	16.5254	0.755843	0.121568
DRB1*08:10	0.236618	0.563058	1.26696	0.42022	3.81985	0.674313	0.171139
DRB1*08:11	-0.77583	0.793778	0.460321	0.0971367	2.18142	0.328376	0.483628
DRB1*09:01	-0.0140903	0.0695739	0.986008	0.860316	1.13006	0.839508	0.0759754
DRB1*10:01	-0.0565115	0.0742019	0.945056	0.817138	1.093	0.446305	0.350368
DRB1*11:01	0.0231574	0.0289039	1.02343	0.96706	1.08308	0.423024	0.373635
DRB1*11:02	0.100838	0.128259	1.1061	0.860235	1.42223	0.431748	0.364769
DRB1*11:03	-0.130348	0.0874146	0.87779	0.739574	1.04184	0.135923	0.866708
DRB1*11:04	-0.0164303	0.0394346	0.983704	0.910536	1.06275	0.676938	0.169451
DRB1*11:08	-0.0967673	1.23043	0.907767	0.0813969	10.1237	0.937315	0.0281144
DRB1*11:09	-0.455044	1.16536	0.63442	0.0646255	6.22802	0.696185	0.157276
DRB1*11:11	-0.265435	0.825837	0.766872	0.151969	3.86981	0.747897	0.126158
DRB1*11:12	-0.420341	0.827481	0.656823	0.129743	3.32517	0.61147	0.213625
DRB1*11:13	-0.511046	1.13367	0.599868	0.0650209	5.53424	0.652143	0.185657
DRB1*11:14	0.417898	0.592398	1.51877	0.475589	4.85009	0.480539	0.318271
DRB1*11:15	-0.97915	1.08159	0.37563	0.0450913	3.12916	0.365313	0.437335
DRB1*11:19	0.592466	1.00465	1.80844	0.252423	12.9563	0.555376	0.255413
DRB1*11:28	0.768573	1.01137	2.15669	0.297092	15.656	0.447295	0.349406
DRB1*11:43	0.622378	1.00333	1.86335	0.260761	13.3152	0.535053	0.271603
DRB1*12:01	-0.0121062	0.0538336	0.987967	0.889034	1.09791	0.822071	0.0850907
DRB1*12:02	0.194493	0.513208	1.2147	0.444238	3.32138	0.704706	0.151992
DRB1*12:03	0.93046	1.01765	2.53568	0.345025	18.6353	0.360549	0.443036
DRB1*13:01	-0.0423615	0.0290469	0.958523	0.905477	1.01468	0.144735	0.839427
DRB1*13:02	0.0185989	0.03278	1.01877	0.955376	1.08638	0.570452	0.243781
DRB1*13:03	-0.140196	0.0661446	0.869188	0.763502	0.989503	0.034045	1.46795
DRB1*13:04	2.0504	1.17505	7.771	0.776694	77.7506	0.0809956	1.09154
DRB1*13:05	-0.145273	0.138947	0.864786	0.65862	1.13549	0.295777	0.529036
DRB1*13:10	0.426093	0.610554	1.53126	0.462739	5.06715	0.485252	0.314033
DRB1*13:15	1.67923	1.24964	5.36141	0.462981	62.086	0.179023	0.74709
DRB1*13:19	0.568016	1.41592	1.76476	0.110009	28.3104	0.688301	0.162222
DRB1*13:22	0.22885	1.24574	1.25715	0.109394	14.4472	0.854244	0.0684181
DRB1*14:01	0.00487532	0.0430048	1.00489	0.923657	1.09326	0.90974	0.0410829
DRB1*14:02	0.495963	0.446251	1.64208	0.684758	3.93777	0.266397	0.574471
DRB1*14:04	0.492777	0.268831	1.63686	0.966445	2.77232	0.0667968	1.17524
DRB1*14:05	0.0691774	1.23307	1.07163	0.0955948	12.013	0.955261	0.0198781
DRB1*14:06	-0.686249	1.10262	0.503461	0.0579954	4.37057	0.533693	0.272708
DRB1*14:07	0.41332	0.653629	1.51183	0.419877	5.44356	0.527161	0.278057
DRB1*15:01	-0.0440861	0.0200556	0.956872	0.919988	0.995234	0.0279353	1.55385
DRB1*15:02	-0.16825	0.0855668	0.845143	0.714651	0.999461	0.0492644	1.30747
DRB1*15:03	0.210952	0.299411	1.23485	0.686675	2.22065	0.481086	0.317777
DRB1*15:04	0.68929	1.42926	1.9923	0.12099	32.8066	0.629613	0.200926
DRB1*15:06	0.838225	1.01427	2.31226	0.316715	16.8812	0.408561	0.388743
DRB1*16:01	-0.148027	0.0583143	0.862408	0.769262	0.966831	0.0111348	1.95332
DRB1*16:02	-0.313557	0.182589	0.730843	0.510977	1.04531	0.0859273	1.06587
DRB1*16:05	-0.127832	0.867741	0.880001	0.160638	4.8208	0.882882	0.0540971
DQB1*02:01	-0.0133185	0.0164424	0.98677	0.955476	1.01909	0.417935	0.378891
DQB1*02:26	-0.487583	1.15779	0.614109	0.0634919	5.93981	0.673657	0.171561
DQB1*03:01	-0.00581079	0.0172903	0.994206	0.961078	1.02848	0.736816	0.132641
DQB1*03:02	0.058747	0.0227107	1.06051	1.01434	1.10878	0.00968848	2.01374
DQB1*03:03	0.0391451	0.0330086	1.03992	0.974772	1.10942	0.235659	0.627716
DQB1*03:04	-0.0153851	0.145749	0.984733	0.740039	1.31034	0.915933	0.0381365
DQB1*03:05	0.202698	0.190575	1.2247	0.842965	1.77931	0.287505	0.541354
DQB1*04:01	-0.142776	1.16713	0.866949	0.0880062	8.54031	0.902637	0.0444868
DQB1*04:02	0.0525204	0.0427586	1.05392	0.969198	1.14606	0.219334	0.658894
DQB1*05:01	0.0470289	0.0211875	1.04815	1.00552	1.0926	0.0264425	1.5777
DQB1*05:02	-0.138258	0.0526714	0.870874	0.785454	0.965584	0.00866701	2.06213
DQB1*05:03	0.026002	0.0424873	1.02634	0.944336	1.11547	0.540541	0.267171
DQB1*05:04	-0.117814	0.195491	0.888862	0.605939	1.30389	0.546738	0.262221
DQB1*06:01	-0.165953	0.0849445	0.847086	0.717169	1.00054	0.0507412	1.29464
DQB1*06:02	-0.0441702	0.0201746	0.956791	0.919696	0.995383	0.0285683	1.54412
DQB1*06:03	-0.044055	0.0285294	0.956901	0.904862	1.01193	0.122541	0.911719
DQB1*06:04	-0.0341104	0.0374752	0.966465	0.898021	1.04012	0.362709	0.440441
DQB1*06:07	-0.585192	1.12076	0.556999	0.0619216	5.01034	0.601575	0.22071
DQB1*06:09	0.186762	0.0669245	1.20534	1.05716	1.37429	0.00526043	2.27898
DQB1*06:14	1.2197	0.867725	3.38617	0.618139	18.5494	0.159834	0.79633
DQB1*06:16	0.0503407	0.868227	1.05163	0.191784	5.7665	0.953764	0.0205592

## Sheet: supp6
Supplementary Table 6. Results for association between HLA alleles and three or more systemic vaccine side effects in the replication cohort (European, N = 4,575; alleles that surpassed the P-value threshold of < 0.05 are significant).
HLA allele	estimate	std.error	odds ratio	lower limit	upper limit	p-values	negative log p-values
A*03:01	0.380587	0.0963166	1.46314	1.21144	1.76715	7.76885e-05	4.10964
DRB1*03:01	-0.370486	0.114844	0.690399	0.551242	0.864684	0.0012554	2.90122
A*29:02	0.47474	0.158387	1.6076	1.17857	2.1928	0.00272348	2.56488
DQB1*02:01	-0.280879	0.0944106	0.755119	0.627555	0.908614	0.00292908	2.53327
B*45:01	0.880584	0.318922	2.41231	1.2911	4.50718	0.00576031	2.23955
B*35:01	0.353403	0.130111	1.4239	1.10339	1.83753	0.00660439	2.18017
A*01:01	-0.262802	0.101725	0.768894	0.629907	0.938548	0.00978144	2.0096
B*08:01	-0.282787	0.115363	0.753681	0.601158	0.944901	0.0142349	1.84664
C*07:01	-0.233309	0.102353	0.791909	0.647964	0.967832	0.0226401	1.64512
DRB1*13:05	1.10961	0.526825	3.03319	1.08008	8.51809	0.0351846	1.45365
DRB1*01:03	-0.770272	0.372686	0.462887	0.222966	0.960976	0.0387521	1.4117
A*25:01	0.398761	0.196044	1.48998	1.01462	2.18804	0.0419482	1.37729
DRB1*13:01	0.256897	0.133719	1.29291	0.994822	1.68032	0.0547099	1.26193
B*35:03	-0.517781	0.28574	0.595841	0.340333	1.04318	0.0699756	1.15505
B*38:01	0.364945	0.208372	1.44043	0.957467	2.16702	0.0798754	1.09759
DRB1*04:08	-1.2712	0.732375	0.280494	0.0667596	1.17851	0.0826121	1.08296
C*15:04	1.44573	0.836164	4.24496	0.82436	21.859	0.0838077	1.07672
C*15:02	0.367069	0.220419	1.4435	0.937112	2.22352	0.0958481	1.01842
A*30:02	-0.776842	0.469827	0.459856	0.183104	1.15491	0.0982365	1.00773
DRB1*16:01	-0.549938	0.334968	0.576985	0.29925	1.11249	0.100639	0.997234
A*23:01	-0.422082	0.261376	0.65568	0.392829	1.09441	0.106345	0.973285
DRB1*13:02	0.229256	0.144551	1.25766	0.947371	1.66959	0.112742	0.947913
DQB1*03:01	0.147322	0.0940681	1.15873	0.963626	1.39333	0.117321	0.930624
A*32:01	-0.282317	0.182182	0.754035	0.527612	1.07763	0.121228	0.916398
A*80:01	2.11513	1.4321	8.2907	0.500687	137.283	0.139689	0.854838
B*07:02	0.149318	0.102301	1.16104	0.950097	1.41882	0.1444	0.840431
DQB1*06:04	0.230864	0.16601	1.25969	0.909814	1.74411	0.164327	0.78429
DRB1*01:02	-0.444037	0.321582	0.641442	0.341524	1.20474	0.167343	0.776392
DRB1*04:02	0.358347	0.265183	1.43096	0.850942	2.40634	0.176593	0.753027
B*14:01	-0.505101	0.377384	0.603445	0.288006	1.26437	0.180757	0.742905
B*39:01	-0.49318	0.374957	0.610682	0.29285	1.27346	0.188411	0.724894
C*02:02	-0.222372	0.174239	0.800617	0.568996	1.12652	0.201868	0.694932
B*35:08	-0.661701	0.525754	0.515973	0.184118	1.44597	0.208184	0.681552
B*52:01	-0.532125	0.431614	0.587355	0.25206	1.36867	0.217623	0.662294
C*03:03	0.178216	0.151324	1.19508	0.888359	1.60771	0.238913	0.621761
B*47:01	-1.19078	1.02706	0.303983	0.0406064	2.27564	0.246291	0.608552
DQB1*05:03	0.214566	0.187863	1.23932	0.857575	1.79101	0.253397	0.596199
DRB1*13:03	0.353598	0.313336	1.42418	0.770636	2.63198	0.25911	0.586515
C*16:01	0.188959	0.168172	1.20799	0.868787	1.67963	0.261179	0.583062
B*51:01	0.167172	0.149637	1.18196	0.881512	1.5848	0.263917	0.578533
A*68:01	0.198647	0.179004	1.21975	0.858816	1.73238	0.267113	0.573305
DRB1*11:01	0.151814	0.141474	1.16394	0.882078	1.53588	0.283231	0.547859
DRB1*15:03	1.24122	1.1605	3.45983	0.35581	33.6426	0.284819	0.545431
DQB1*06:03	0.141696	0.132733	1.15223	0.888287	1.49459	0.285735	0.544037
DQB1*05:02	-0.287498	0.270403	0.750138	0.441539	1.27442	0.287682	0.541087
A*02:05	-0.368931	0.357978	0.691473	0.342814	1.39474	0.30273	0.518945
B*44:05	0.520904	0.513727	1.68355	0.615081	4.60807	0.310597	0.507803
B*27:05	-0.186673	0.187783	0.829715	0.574229	1.19887	0.320179	0.494607
C*12:02	-0.42943	0.432726	0.65088	0.278713	1.52	0.321011	0.493481
A*31:01	-0.216475	0.219063	0.805352	0.524223	1.23725	0.323061	0.490715
C*07:02	0.098279	0.0998842	1.10327	0.907108	1.34185	0.32515	0.487916
DRB1*14:04	0.649563	0.669337	1.9147	0.515645	7.10973	0.331818	0.4791
DRB1*04:01	0.110249	0.11799	1.11656	0.886024	1.40707	0.350101	0.455807
A*30:04	0.717327	0.797774	2.04895	0.428995	9.78612	0.368567	0.433483
DQB1*06:09	0.235476	0.26298	1.26551	0.75581	2.11894	0.370566	0.431134
DRB1*08:04	0.581342	0.651998	1.78844	0.49829	6.41897	0.37259	0.428769
B*55:01	0.209227	0.235241	1.23273	0.777364	1.95482	0.37378	0.427384
C*03:04	0.107458	0.124052	1.11344	0.873119	1.41992	0.386361	0.413007
A*11:01	0.118141	0.138276	1.1254	0.858233	1.47574	0.392889	0.40573
B*39:06	-0.403787	0.477698	0.667786	0.261826	1.70319	0.397956	0.400165
DQB1*06:02	0.0855004	0.104378	1.08926	0.887736	1.33654	0.412705	0.38436
DRB1*10:01	0.265444	0.325145	1.30401	0.689464	2.46632	0.41428	0.382706
DRB1*04:05	-0.391674	0.479808	0.675925	0.263923	1.73109	0.414321	0.382663
DRB1*04:04	-0.155521	0.193403	0.855969	0.58591	1.25051	0.421323	0.375385
B*51:07	0.653797	0.815492	1.92283	0.388848	9.50826	0.422715	0.373953
DRB1*12:01	-0.231484	0.289312	0.793356	0.449988	1.39873	0.423642	0.373001
C*01:02	-0.142108	0.180959	0.867528	0.608482	1.23686	0.432277	0.364238
DRB1*15:01	0.0786251	0.103005	1.0818	0.884029	1.32381	0.445277	0.351369
B*18:03	0.886154	1.2124	2.42578	0.225337	26.1139	0.464837	0.3327
DRB1*01:01	0.0862751	0.118232	1.09011	0.864625	1.37439	0.465568	0.332017
B*37:01	0.176135	0.244394	1.1926	0.73869	1.92542	0.471094	0.326893
DQB1*06:01	-0.312474	0.434207	0.731635	0.312385	1.71356	0.471746	0.326292
A*68:02	-0.272426	0.379694	0.76153	0.361814	1.60283	0.473072	0.325073
B*15:24	0.801652	1.11746	2.22922	0.249433	19.9229	0.473134	0.325016
DRB1*14:01	0.137941	0.194779	1.14791	0.783624	1.68154	0.478825	0.319823
A*02:02	0.819307	1.15958	2.26893	0.233759	22.0228	0.479842	0.318902
C*16:02	-0.521109	0.744598	0.593862	0.137997	2.55564	0.484019	0.315137
DRB1*07:01	-0.0720705	0.103807	0.930465	0.759168	1.14041	0.48751	0.312016
DRB1*15:02	-0.301637	0.434535	0.739606	0.315585	1.73334	0.487581	0.311953
DRB1*11:02	0.383149	0.55361	1.4669	0.495629	4.34152	0.48888	0.310798
B*15:01	0.0953133	0.141125	1.1	0.834193	1.45051	0.499432	0.301524
C*14:02	0.207652	0.307676	1.23079	0.673416	2.24947	0.499735	0.30126
B*44:02	0.0792297	0.117868	1.08245	0.859168	1.36377	0.501462	0.299762
A*33:03	-0.496679	0.748251	0.608548	0.140401	2.63766	0.506827	0.295141
A*02:06	-0.687757	1.04763	0.502702	0.0644981	3.9181	0.511512	0.291145
B*13:02	0.133236	0.203283	1.14252	0.767054	1.70177	0.512196	0.290563
DRB1*04:03	-0.219617	0.343017	0.802826	0.409864	1.57255	0.52201	0.282321
B*40:01	0.0923522	0.145485	1.09675	0.824649	1.45864	0.525566	0.279373
DRB1*16:02	-0.64117	1.05304	0.526676	0.0668617	4.14868	0.542607	0.265514
A*26:01	0.111523	0.186439	1.11798	0.775772	1.61114	0.549722	0.259857
B*57:01	-0.10988	0.18375	0.895941	0.624983	1.28437	0.549848	0.259757
B*27:02	-0.366128	0.612289	0.693414	0.208834	2.30242	0.549863	0.259745
A*24:03	0.338904	0.567613	1.40341	0.461341	4.2692	0.550461	0.259273
B*15:17	-0.316195	0.53365	0.728917	0.25611	2.07458	0.553506	0.256878
DRB1*08:01	0.123886	0.209187	1.13189	0.751171	1.70556	0.553701	0.256724
A*30:01	-0.193997	0.328711	0.82366	0.432458	1.56874	0.555073	0.25565
DRB1*11:03	0.21054	0.374663	1.23434	0.592266	2.5725	0.574153	0.240972
C*17:01	0.188383	0.3353	1.2073	0.625749	2.32931	0.574229	0.240915
A*33:01	-0.227016	0.4076	0.796908	0.358469	1.7716	0.577556	0.238406
B*44:04	0.605772	1.10585	1.83267	0.209779	16.0105	0.583839	0.233707
B*18:01	-0.0912351	0.168097	0.912803	0.656584	1.26901	0.5873	0.23114
B*40:02	-0.15519	0.293131	0.856252	0.48204	1.52097	0.596513	0.22438
C*12:03	0.0783525	0.148941	1.0815	0.807694	1.44814	0.598844	0.222686
A*29:01	0.287236	0.546273	1.33274	0.456823	3.88814	0.59902	0.222559
C*03:02	-0.529782	1.0414	0.588733	0.0764645	4.53292	0.610949	0.213995
DRB1*12:02	0.576551	1.14644	1.77989	0.188157	16.837	0.615032	0.211103
A*24:02	-0.0606057	0.120833	0.941194	0.742718	1.19271	0.615973	0.210438
DRB1*11:04	0.0864064	0.181207	1.09025	0.764328	1.55515	0.633477	0.198269
DQB1*03:05	0.301772	0.646159	1.35225	0.381098	4.79821	0.640482	0.193493
B*57:02	0.525252	1.13592	1.69088	0.182475	15.6684	0.643792	0.191255
B*41:01	0.208142	0.455176	1.23139	0.504594	3.00503	0.64747	0.18878
B*50:01	-0.142646	0.316682	0.867061	0.466105	1.61293	0.652394	0.18549
DQB1*05:04	0.3371	0.809003	1.40088	0.286922	6.83971	0.676908	0.16947
B*14:02	0.0748399	0.185167	1.07771	0.749697	1.54924	0.686083	0.163623
B*07:05	0.252872	0.632066	1.28772	0.373074	4.44474	0.689104	0.161715
C*06:02	0.0451466	0.116732	1.04618	0.832229	1.31514	0.698937	0.155562
A*66:01	-0.197482	0.535581	0.820795	0.287303	2.34493	0.712333	0.147317
B*44:03	-0.0524265	0.148392	0.948924	0.709443	1.26925	0.723866	0.140342
DQB1*05:01	-0.0367383	0.109002	0.963928	0.778504	1.19352	0.736084	0.133073
B*07:04	-0.314076	1.05831	0.730464	0.0917802	5.81364	0.766641	0.115408
B*40:06	0.331323	1.13196	1.39281	0.151476	12.8067	0.769753	0.113648
B*56:01	0.112111	0.390323	1.11864	0.520522	2.40402	0.77394	0.111293
DQB1*04:02	0.0563017	0.19869	1.05792	0.716677	1.56164	0.776897	0.109636
C*07:04	0.06692	0.242589	1.06921	0.66461	1.72012	0.782658	0.106428
C*04:01	0.0281196	0.108797	1.02852	0.831002	1.27298	0.796053	0.0990582
B*15:18	-0.184223	0.766562	0.83175	0.185132	3.73683	0.810079	0.0914725
B*58:01	-0.0816724	0.438203	0.921574	0.390413	2.17539	0.852147	0.0694857
A*34:02	0.200622	1.10839	1.22216	0.139202	10.7304	0.856365	0.0673409
C*08:02	-0.0298584	0.168386	0.970583	0.69775	1.3501	0.859256	0.0658776
B*35:02	-0.0568618	0.344398	0.944725	0.481003	1.85551	0.868862	0.0610494
B*15:03	0.127891	0.784807	1.13643	0.244063	5.29156	0.870551	0.0602058
DRB1*08:03	0.101612	0.632774	1.10695	0.320259	3.82612	0.872422	0.0592732
B*53:01	-0.110688	0.755075	0.895218	0.203796	3.93244	0.883454	0.0538161
DRB1*04:07	-0.0478322	0.328312	0.953294	0.500913	1.81423	0.884165	0.0534667
A*03:02	-0.0644893	0.619296	0.937546	0.278508	3.15608	0.917064	0.0376006
A*02:01	-0.00917493	0.0903719	0.990867	0.830021	1.18288	0.919134	0.036621
B*41:02	0.0403602	0.487852	1.04119	0.400185	2.70892	0.934066	0.0296225
B*55:44	14.5989	196.968	2.18897e+06	4.76359e-162	1.00588e+174	0.940916	0.0264491
DQB1*03:03	0.0113537	0.155327	1.01142	0.745956	1.37135	0.94173	0.0260734
DRB1*09:01	-0.0242165	0.332295	0.976074	0.508894	1.87214	0.941905	0.0259931
DRB1*04:11	13.708	196.968	898064	1.95446e-162	4.12656e+173	0.944516	0.0247907
C*15:11	13.3769	196.968	644914	1.40354e-162	2.96333e+173	0.945854	0.0241759
A*32:04	13.3218	196.968	610375	1.32837e-162	2.80463e+173	0.946077	0.0240737
DQB1*06:20	13.3218	196.968	610375	1.32837e-162	2.80463e+173	0.946077	0.0240737
DQB1*04:01	14.4726	217.987	1.92922e+06	5.38446e-180	6.91229e+191	0.947066	0.0236199
B*14:06	13.0472	196.968	463784	1.00934e-162	2.13106e+173	0.947187	0.0235644
B*15:71	12.9376	196.968	415630	9.04536e-163	1.9098e+173	0.94763	0.0233613
DRB1*15:06	12.84	196.968	376997	8.20405e-163	1.7324e+173	0.948024	0.0231806
B*07:09	12.6761	196.968	320022	6.9641e-163	1.4706e+173	0.948686	0.0228773
C*05:01	0.00742468	0.122808	1.00745	0.791933	1.28162	0.951791	0.0214584
B*57:03	-11.3591	195.027	1.1663e-05	1.13827e-171	1.19502e+161	0.953555	0.0206544
B*48:01	-11.5037	198.471	1.00925e-05	1.15296e-174	8.83459e+163	0.953779	0.0205521
A*69:01	-10.998	197.03	1.67353e-05	3.22586e-173	8.68205e+162	0.955486	0.0197757
A*02:17	-11.7277	211.104	8.067e-06	1.6256e-185	4.00323e+174	0.955697	0.0196798
DRB1*11:08	-10.475	196.968	2.82322e-05	6.1437e-173	1.29735e+163	0.957587	0.0188216
B*67:01	-10.4739	196.968	2.82648e-05	6.15121e-173	1.29877e+163	0.957592	0.0188195
B*38:24	-10.4739	196.968	2.82648e-05	6.15121e-173	1.29877e+163	0.957592	0.0188195
DQB1*03:55	-10.3635	196.968	3.15629e-05	6.86901e-173	1.45031e+163	0.958038	0.0186171
C*06:04	-10.3084	196.968	3.33525e-05	7.25849e-173	1.53254e+163	0.958261	0.018516
B*07:96	-10.2532	196.968	3.52429e-05	7.66991e-173	1.6194e+163	0.958484	0.0184149
C*05:36	-10.2532	196.968	3.52429e-05	7.66991e-173	1.6194e+163	0.958484	0.0184149
C*14:11	-10.2532	196.968	3.52429e-05	7.66991e-173	1.6194e+163	0.958484	0.0184149
B*18:11	-10.2532	196.968	3.52429e-05	7.66991e-173	1.6194e+163	0.958484	0.0184149
B*07:14	-10.2532	196.968	3.52429e-05	7.66991e-173	1.6194e+163	0.958484	0.0184149
A*29:12	-10.2532	196.968	3.52429e-05	7.66991e-173	1.6194e+163	0.958484	0.0184149
DRB1*08:11	-10.2532	196.968	3.52429e-05	7.66991e-173	1.6194e+163	0.958484	0.0184149
DRB1*11:11	-10.1981	196.968	3.72398e-05	8.1045e-173	1.71115e+163	0.958707	0.0183139
B*151:32	-10.1981	196.968	3.72398e-05	8.1045e-173	1.71115e+163	0.958707	0.0183139
A*01:02	-10.1981	196.968	3.72398e-05	8.1045e-173	1.71115e+163	0.958707	0.0183139
B*38:02	-10.1431	196.968	3.9345e-05	8.56218e-173	1.80799e+163	0.95893	0.0182131
A*11:62	-10.143	196.968	3.93491e-05	8.56357e-173	1.80807e+163	0.95893	0.0182129
DRB1*11:32	-10.143	196.968	3.93491e-05	8.56357e-173	1.80807e+163	0.95893	0.0182129
B*18:55	-10.088	196.968	4.15774e-05	9.04852e-173	1.91046e+163	0.959153	0.018112
C*07:60	-10.088	196.968	4.15774e-05	9.04852e-173	1.91046e+163	0.959153	0.018112
C*07:28	-10.088	196.968	4.15774e-05	9.04852e-173	1.91046e+163	0.959153	0.018112
A*241:78	-10.088	196.968	4.15774e-05	9.04852e-173	1.91046e+163	0.959153	0.018112
B*441:28	-10.088	196.968	4.15774e-05	9.04852e-173	1.91046e+163	0.959153	0.018112
A*023:46	-10.0879	196.968	4.15791e-05	9.04838e-173	1.91064e+163	0.959153	0.018112
B*51:05	-10.0329	196.968	4.39312e-05	9.56079e-173	2.01861e+163	0.959376	0.0180112
DRB1*03:04	-10.0329	196.968	4.39312e-05	9.56079e-173	2.01861e+163	0.959376	0.0180112
A*29:36	-10.0329	196.968	4.39312e-05	9.56079e-173	2.01861e+163	0.959376	0.0180112
A*24:05	-10.0329	196.968	4.39312e-05	9.56079e-173	2.01861e+163	0.959376	0.0180112
B*73:01	-11.4821	225.969	1.03132e-05	4.62459e-198	2.29992e+187	0.959475	0.0179665
A*26:08	-12.4943	247.042	3.74811e-06	1.94001e-216	7.24136e+204	0.959664	0.0178809
A*01:03	-11.0324	218.621	1.61691e-05	1.30162e-191	2.00856e+181	0.959753	0.0178405
DRB1*07:61	-9.92278	196.968	4.90445e-05	1.06736e-172	2.25356e+163	0.959821	0.0178096
C*14:03	-11.1681	221.739	1.41176e-05	2.51962e-194	7.91017e+183	0.959831	0.0178053
A*02:24	-9.86775	196.968	5.18194e-05	1.12775e-172	2.38106e+163	0.960044	0.0177088
A*11:09	-9.86719	196.968	5.18481e-05	1.12832e-172	2.3825e+163	0.960046	0.0177078
DRB1*14:17	-11.4479	229.613	1.06718e-05	3.78031e-201	3.01265e+190	0.960236	0.017622
A*11:30	-9.81272	196.968	5.47508e-05	1.19155e-172	2.51576e+163	0.960267	0.0176081
B*151:57	-9.81272	196.968	5.47508e-05	1.19155e-172	2.51576e+163	0.960267	0.0176081
C*03:18	-9.81272	196.968	5.47508e-05	1.19155e-172	2.51576e+163	0.960267	0.0176081
B*401:12	-9.7577	196.968	5.78476e-05	1.25895e-172	2.65806e+163	0.960489	0.0175075
C*032:79	-9.7577	196.968	5.78476e-05	1.25895e-172	2.65806e+163	0.960489	0.0175075
A*68:12	-9.7577	196.968	5.78476e-05	1.25895e-172	2.65806e+163	0.960489	0.0175075
C*12:05	-9.7577	196.968	5.78476e-05	1.25895e-172	2.65806e+163	0.960489	0.0175075
B*35:38	-9.75693	196.968	5.78922e-05	1.25985e-172	2.66023e+163	0.960492	0.0175061
B*18:05	-9.70268	196.968	6.11192e-05	1.33015e-172	2.80838e+163	0.960712	0.0174068
DQB1*02:26	-9.70268	196.968	6.11192e-05	1.33015e-172	2.80838e+163	0.960712	0.0174068
B*41:07	-9.70182	196.968	6.11723e-05	1.33124e-172	2.81096e+163	0.960715	0.0174053
DQB1*03:08	-10.9093	222.335	1.82869e-05	1.01657e-194	3.2896e+184	0.960866	0.0173373
B*51:09	-12.8127	261.202	2.726e-06	1.2461e-228	5.96345e+216	0.960877	0.0173321
C*15:06	-9.64768	196.968	6.45755e-05	1.40536e-172	2.9672e+163	0.960934	0.0173062
DRB1*04:06	-11.5173	235.285	9.95654e-06	5.24126e-206	1.89139e+195	0.960959	0.0172952
A*29:04	-9.59267	196.968	6.82268e-05	1.48483e-172	3.13498e+163	0.961157	0.0172057
A*29:03	-9.53767	196.968	7.20844e-05	1.56878e-172	3.31223e+163	0.96138	0.0171051
B*42:02	-9.53767	196.968	7.20844e-05	1.56878e-172	3.31223e+163	0.96138	0.0171051
A*03:07	-9.48268	196.968	7.61597e-05	1.65747e-172	3.4995e+163	0.961602	0.0170046
B*39:31	-9.48268	196.968	7.61597e-05	1.65747e-172	3.4995e+163	0.961602	0.0170046
DQB1*06:16	-9.48268	196.968	7.61597e-05	1.65747e-172	3.4995e+163	0.961602	0.0170046
C*02:07	-9.48268	196.968	7.61597e-05	1.65747e-172	3.4995e+163	0.961602	0.0170046
B*55:02	-9.48147	196.968	7.62518e-05	1.6594e-172	3.50388e+163	0.961607	0.0170024
DRB1*13:10	-9.48147	196.968	7.62518e-05	1.6594e-172	3.50388e+163	0.961607	0.0170024
B*27:14	-11.0334	229.628	1.61532e-05	5.55333e-201	4.69854e+190	0.961677	0.0169706
B*35:41	-11.2346	234.419	1.32092e-05	3.79805e-205	4.594e+194	0.961776	0.0169262
B*07:07	-9.42768	196.968	8.04653e-05	1.75117e-172	3.69734e+163	0.961825	0.0169041
B*35:04	-9.42768	196.968	8.04653e-05	1.75117e-172	3.69734e+163	0.961825	0.0169041
C*03:19	-9.42768	196.968	8.04653e-05	1.75117e-172	3.69734e+163	0.961825	0.0169041
C*01:27	-10.7839	226.347	2.07299e-05	4.42632e-198	9.70845e+187	0.962	0.0168247
A*26:09	-9.37269	196.968	8.5014e-05	1.85016e-172	3.90636e+163	0.962047	0.0168037
A*11:02	-9.37269	196.968	8.5014e-05	1.85016e-172	3.90636e+163	0.962047	0.0168037
DRB1*14:05	-9.37269	196.968	8.5014e-05	1.85016e-172	3.90636e+163	0.962047	0.0168037
A*68:41	-9.31771	196.968	8.98198e-05	1.95474e-172	4.12719e+163	0.96227	0.0167033
B*51:65	-9.31771	196.968	8.98198e-05	1.95474e-172	4.12719e+163	0.96227	0.0167033
C*15:09	-9.31771	196.968	8.98198e-05	1.95474e-172	4.12719e+163	0.96227	0.0167033
DQB1*03:04	-13.7504	292.029	1.06723e-06	2.80761e-255	4.05673e+242	0.962445	0.0166242
DRB1*14:07	-10.7496	228.414	2.1453e-05	7.96952e-200	5.77489e+189	0.962464	0.0166156
B*51:08	-11.0925	235.74	1.52268e-05	3.28686e-206	7.05404e+195	0.96247	0.0166126
A*24:58	-9.26125	196.968	9.50368e-05	2.0682e-172	4.36709e+163	0.962498	0.0166002
C*04:04	-9.20773	196.968	0.000100261	2.18197e-172	4.60699e+163	0.962715	0.0165025
DRB1*13:24	-9.20773	196.968	0.000100261	2.18197e-172	4.60699e+163	0.962715	0.0165025
DRB1*11:09	-9.15275	196.968	0.000105928	2.3053e-172	4.86742e+163	0.962937	0.0164021
C*07:22	-9.15117	196.968	0.000106096	2.30886e-172	4.87529e+163	0.962943	0.0163992
B*27:08	-10.6472	229.628	2.37678e-05	8.17486e-201	6.91028e+190	0.963018	0.0163657
C*08:07	-9.09776	196.968	0.000111916	2.4356e-172	5.14256e+163	0.96316	0.0163018
A*02:35	-9.09613	196.968	0.000112099	2.43949e-172	5.15112e+163	0.963166	0.0162988
DRB1*11:43	-9.09613	196.968	0.000112099	2.43949e-172	5.15112e+163	0.963166	0.0162988
B*15:16	-8.98779	196.968	0.000124926	2.71871e-172	5.7404e+163	0.963605	0.0161012
C*03:16	-8.98779	196.968	0.000124926	2.71871e-172	5.7404e+163	0.963605	0.0161012
DRB1*08:02	-11.8753	261.509	6.96047e-06	1.74426e-228	2.77758e+217	0.96378	0.016022
B*15:39	-8.9328	196.968	0.000131987	2.87238e-172	6.0649e+163	0.963827	0.0160009
A*68:03	-8.93105	196.968	0.000132219	2.87734e-172	6.07575e+163	0.963834	0.0159977
B*39:05	-8.93105	196.968	0.000132219	2.87734e-172	6.07575e+163	0.963834	0.0159977
B*35:12	-8.93105	196.968	0.000132219	2.87734e-172	6.07575e+163	0.963834	0.0159977
DRB1*04:39	-8.87782	196.968	0.000139448	3.03473e-172	6.40775e+163	0.96405	0.0159006
DQB1*0626N	-8.87782	196.968	0.000139448	3.03473e-172	6.40775e+163	0.96405	0.0159006
A*25:02	-8.87602	196.968	0.000139698	3.04009e-172	6.41944e+163	0.964057	0.0158974
DRB1*13:36	-8.87602	196.968	0.000139698	3.04009e-172	6.41944e+163	0.964057	0.0158974
B*58:02	-8.87602	196.968	0.000139698	3.04009e-172	6.41944e+163	0.964057	0.0158974
A*02:27	-8.821	196.968	0.0001476	3.21204e-172	6.78256e+163	0.964279	0.0157971
B*27:07	-10.1869	227.505	3.76617e-05	8.31307e-199	1.70624e+189	0.964285	0.0157944
A*74:03	-11.8597	265.383	7.06976e-06	8.93527e-232	5.59373e+220	0.964355	0.015763
DRB1*11:27	-8.76784	196.968	0.000155659	3.38749e-172	7.15272e+163	0.964495	0.0157002
B*14:03	-8.76784	196.968	0.000155659	3.38749e-172	7.15272e+163	0.964495	0.0157002
B*54:01	-8.76784	196.968	0.000155659	3.38749e-172	7.15272e+163	0.964495	0.0157002
C*08:03	-11.5887	260.487	9.2707e-06	1.72339e-227	4.98702e+216	0.964515	0.015691
C*18:01	-10.2081	229.568	3.68719e-05	1.42598e-200	9.53407e+190	0.964533	0.015683
B*13:01	-9.99452	225.929	4.56494e-05	2.21188e-197	9.42124e+187	0.964715	0.0156009
A*02:30	-8.71285	196.968	0.000164458	3.57897e-172	7.55709e+163	0.964717	0.0156
B*42:01	-8.71285	196.968	0.000164458	3.57897e-172	7.55709e+163	0.964717	0.0156
B*44:06	-8.71096	196.968	0.000164769	3.58564e-172	7.57157e+163	0.964725	0.0155966
C*03:10	-8.71096	196.968	0.000164769	3.58564e-172	7.57157e+163	0.964725	0.0155966
A*02:03	-8.65786	196.968	0.000173755	3.78127e-172	7.98433e+163	0.96494	0.0154998
A*36:02	-8.60287	196.968	0.000183578	3.99501e-172	8.43574e+163	0.965162	0.0153997
C*02:19	-8.54788	196.968	0.000193956	4.22084e-172	8.91269e+163	0.965385	0.0152995
A*02:22	-9.89399	228.669	5.04773e-05	1.13744e-199	2.24007e+190	0.965488	0.0152531
B*35:43	-8.4909	196.968	0.000205329	4.46821e-172	9.43552e+163	0.965615	0.0151958
B*50:02	-11.2379	261.856	1.31655e-05	1.67052e-228	1.03758e+218	0.965768	0.0151271
B*15:07	-11.2882	265.908	1.25199e-05	5.65302e-232	2.77284e+221	0.966139	0.0149605
DRB1*08:10	-8.32585	196.968	0.000242174	5.26994e-172	1.11288e+164	0.966283	0.0148955
A*11:12	-8.32585	196.968	0.000242174	5.26994e-172	1.11288e+164	0.966283	0.0148955
A*33:05	-12.4807	300.922	3.79917e-06	2.69121e-262	5.36327e+250	0.966917	0.0146107
C*16:04	0.0317535	0.768424	1.03226	0.228926	4.65464	0.967038	0.0145562
DRB1*14:02	-11.5919	294.953	9.24083e-06	7.8807e-257	1.08357e+246	0.968651	0.0138328
A*74:01	-11.748	304.015	7.90486e-06	1.3029e-264	4.79599e+253	0.969175	0.0135978
B*07:10	-11.6294	301.785	8.90058e-06	1.1607e-262	6.82521e+251	0.969261	0.0135593
B*39:24	-11.6605	305.145	8.62775e-06	1.55238e-265	4.79508e+254	0.969518	0.0134442
C*08:01	-11.3763	307.377	1.14641e-05	2.59778e-267	5.05918e+256	0.970476	0.013015
DQB1*03:02	-0.0039375	0.116375	0.99607	0.792921	1.25127	0.973009	0.0118832
C*15:05	-0.0157483	0.62312	0.984375	0.290235	3.33865	0.979837	0.0088462
B*49:01	6.02856e-06	0.253488	1.00001	0.608456	1.64352	0.999981	8.2411e-06

## Sheet: supp7
Supplementary Table 7. Results for association between HLA alleles and three or more systemic vaccine side effects in the discovery cohort (Hispanic, N = 4,287; alleles that passed the significance level P value < 0.05).
HLA allele	estimate	std.error	odds ratio	lower limit	upper limit	p-values	negative log p-values
A*03:01	0.377023	0.0761226	1.45794	1.25586	1.69253	7.31353e-07	6.13587
C*06:02	0.29431	0.0869004	1.3422	1.132	1.59143	0.000707262	3.15042
B*50:01	0.502765	0.165139	1.65329	1.19613	2.28516	0.00233074	2.63251
DQB1*03:02	-0.188771	0.0644465	0.827976	0.729726	0.939455	0.00339937	2.4686
DQB1*03:03	0.400787	0.147329	1.493	1.11854	1.99282	0.00652101	2.18568
A*11:01	-0.294904	0.111303	0.744603	0.598662	0.926122	0.00805996	2.09367
B*40:11	1.26583	0.533134	3.54603	1.24718	10.0822	0.0175815	1.75495
B*13:02	0.424521	0.183398	1.52886	1.06722	2.19017	0.0206268	1.68557
B*57:02	1.36173	0.616601	3.90294	1.16555	13.0693	0.0272133	1.56522
A*24:02	-0.161728	0.0744664	0.850672	0.735149	0.984349	0.0298683	1.52479
A*33:03	-0.748287	0.352074	0.473176	0.237318	0.943441	0.033556	1.47423
DRB1*15:03	-0.635765	0.303917	0.52953	0.291871	0.960706	0.0364475	1.43833
B*40:05	-0.912086	0.449286	0.401686	0.166512	0.969006	0.0423487	1.37316
B*40:27	1.65038	0.840401	5.20895	1.0032	27.0467	0.0495536	1.30492
DRB1*07:01	0.135378	0.0709141	1.14497	0.996393	1.3157	0.0562561	1.24983
B*35:08	-0.700518	0.374435	0.496328	0.238256	1.03394	0.0613636	1.21209
B*39:06	-0.333235	0.183725	0.716602	0.499905	1.02723	0.0697136	1.15668
B*41:02	-0.678264	0.375353	0.507497	0.243179	1.05911	0.0707617	1.1502
B*58:01	-0.423659	0.237364	0.654647	0.411111	1.04245	0.074286	1.12909
B*40:06	2.05007	1.16489	7.76842	0.792063	76.1914	0.0784278	1.10553
DRB1*04:02	-0.377555	0.221274	0.685535	0.444301	1.05775	0.0879561	1.05573
A*02:05	0.304854	0.179596	1.35643	0.95394	1.92873	0.089613	1.04763
DQB1*06:03	0.180087	0.106489	1.19732	0.971775	1.47522	0.0908115	1.04186
DRB1*09:01	0.3559	0.211049	1.42747	0.943881	2.15881	0.0917301	1.03749
DQB1*02:01	0.0976069	0.0593158	1.10253	0.981521	1.23846	0.099857	1.00062
A*23:01	0.21422	0.133501	1.2389	0.953667	1.60943	0.108573	0.964277
DRB1*04:07	-0.170559	0.106766	0.843193	0.683985	1.03946	0.110152	0.958008
DQB1*05:01	0.113139	0.0724345	1.11979	0.971579	1.2906	0.118299	0.927019
A*29:02	0.174995	0.112854	1.19124	0.954852	1.48615	0.120991	0.917248
B*39:01	0.368686	0.238446	1.44583	0.906043	2.30721	0.122056	0.913442
B*51:02	-0.643866	0.420017	0.525258	0.230593	1.19646	0.125288	0.902091
DRB1*08:01	0.279663	0.184549	1.32268	0.921223	1.8991	0.129675	0.887145
C*08:02	0.149395	0.101174	1.16113	0.952271	1.4158	0.139778	0.85456
C*03:02	-0.618378	0.424992	0.538818	0.234251	1.23937	0.14566	0.83666
B*35:03	0.25235	0.173965	1.28705	0.915192	1.80999	0.146897	0.832986
B*14:02	0.161692	0.111528	1.1755	0.944687	1.4627	0.147116	0.83234
B*15:03	-0.383443	0.267229	0.681511	0.403648	1.15065	0.15132	0.820105
B*40:04	-1.48341	1.05185	0.226863	0.0288677	1.78286	0.158456	0.800092
B*51:01	0.150727	0.107278	1.16268	0.942199	1.43475	0.160019	0.795828
B*39:05	-0.245897	0.175526	0.782003	0.554368	1.10311	0.161239	0.792529
B*35:05	-0.873881	0.629985	0.417329	0.121402	1.43461	0.165398	0.781471
B*58:02	0.643637	0.464207	1.90339	0.766279	4.7279	0.165585	0.780979
DRB1*04:08	-0.695381	0.503083	0.498884	0.186109	1.33731	0.166899	0.777547
C*16:01	0.140163	0.101873	1.15046	0.942227	1.40471	0.168866	0.772457
C*15:02	0.205234	0.14931	1.22781	0.916298	1.64523	0.169272	0.771416
A*66:01	-0.466074	0.340632	0.627461	0.321836	1.22331	0.17123	0.766421
C*17:01	-0.255337	0.187206	0.774656	0.53673	1.11805	0.172589	0.762987
C*08:01	-0.248111	0.182596	0.780273	0.545529	1.11603	0.17421	0.758926
DQB1*06:02	-0.112184	0.0830556	0.89388	0.759593	1.05191	0.176789	0.752544
DQB1*06:09	-0.369475	0.273894	0.691097	0.404014	1.18218	0.177345	0.75118
DRB1*12:02	1.24412	0.929416	3.46986	0.561277	21.451	0.180701	0.743039
B*35:01	0.126397	0.0950763	1.13473	0.94181	1.36718	0.183706	0.735877
A*02:11	-0.845497	0.636542	0.429344	0.123302	1.495	0.18409	0.73497
DRB1*13:01	0.14021	0.108825	1.15052	0.92952	1.42405	0.197608	0.704196
B*15:16	-0.704654	0.559296	0.49428	0.165155	1.4793	0.207707	0.682548
B*39:13	1.14614	0.92081	3.14603	0.517552	19.1237	0.213238	0.671136
C*16:02	-0.447155	0.36108	0.639445	0.315098	1.29766	0.215575	0.666401
B*15:01	0.161745	0.131741	1.17556	0.908039	1.5219	0.219542	0.658483
B*48:03	1.50119	1.22722	4.48703	0.404885	49.7263	0.221236	0.655145
DRB1*04:11	-0.233437	0.195832	0.791808	0.539417	1.16229	0.23325	0.632178
B*40:01	0.178881	0.150914	1.19588	0.889664	1.60749	0.235893	0.627285
DRB1*04:03	-0.229643	0.194113	0.794817	0.543294	1.16279	0.236793	0.62563
A*30:04	0.422442	0.364154	1.52568	0.747291	3.11486	0.246023	0.609024
DRB1*01:03	0.254788	0.220203	1.29019	0.837939	1.98652	0.247248	0.606868
DRB1*08:07	1.05972	0.917366	2.88557	0.477919	17.4225	0.248016	0.60552
B*08:01	-0.1199	0.10426	0.887009	0.72307	1.08812	0.250137	0.601822
A*66:02	0.952052	0.830769	2.59102	0.508518	13.2019	0.2518	0.598945
B*35:17	-0.256829	0.225659	0.773501	0.497023	1.20377	0.255066	0.593347
A*68:03	-0.266437	0.236127	0.766104	0.482272	1.21698	0.259167	0.58642
A*34:02	-0.727514	0.649231	0.483108	0.135334	1.72457	0.262467	0.580925
DRB1*01:02	0.142694	0.129087	1.15338	0.89555	1.48543	0.268983	0.570275
DRB1*08:06	-0.845914	0.771937	0.429165	0.0945231	1.94854	0.273152	0.563596
A*02:20	0.890298	0.822323	2.43585	0.486045	12.2075	0.278958	0.55446
DRB1*14:01	0.172573	0.160016	1.18836	0.868437	1.62613	0.280825	0.551564
DRB1*08:10	1.0819	1.01185	2.95027	0.406028	21.4371	0.284969	0.545203
C*16:04	-1.15825	1.08359	0.314034	0.0375498	2.62631	0.285112	0.544984
B*35:43	0.309155	0.291095	1.36227	0.769979	2.41018	0.288217	0.54028
B*07:04	1.28055	1.22801	3.59862	0.324216	39.9428	0.297047	0.527174
C*12:02	-0.245912	0.236846	0.781991	0.49158	1.24397	0.299141	0.524124
C*08:03	0.479148	0.468297	1.6147	0.644865	4.0431	0.306227	0.513957
B*51:07	-0.795017	0.78615	0.451574	0.0967262	2.10821	0.311883	0.506009
DRB1*03:02	-0.293032	0.290591	0.745998	0.422068	1.31854	0.313262	0.504092
A*68:17	0.821077	0.827033	2.27295	0.44937	11.4967	0.320808	0.493754
C*03:06	-0.309273	0.312735	0.73398	0.39763	1.35485	0.322698	0.491203
A*02:01	0.0544303	0.0554279	1.05594	0.947235	1.17712	0.326099	0.486651
B*14:01	0.217971	0.226697	1.24355	0.797435	1.93924	0.336298	0.473276
DRB1*13:02	-0.115643	0.120452	0.890793	0.703471	1.128	0.337016	0.472349
DQB1*05:02	-0.191671	0.200994	0.825578	0.556761	1.22419	0.340277	0.468167
C*07:02	-0.065022	0.0687696	0.937047	0.818886	1.07226	0.344401	0.462935
A*31:02	-0.743499	0.786494	0.475447	0.101771	2.22116	0.344488	0.462826
B*42:01	-0.343254	0.363322	0.709458	0.348066	1.44608	0.344779	0.462459
A*68:05	-0.443346	0.469869	0.641885	0.255562	1.6122	0.345398	0.46168
A*02:17	-0.738215	0.784839	0.477966	0.102643	2.2257	0.346913	0.45978
A*02:02	0.321478	0.343047	1.37917	0.704059	2.70162	0.348693	0.457556
C*07:01	-0.0689035	0.074111	0.933417	0.807218	1.07934	0.352509	0.45283
A*02:22	-0.988627	1.08267	0.372087	0.0445718	3.1062	0.361169	0.44229
DQB1*06:01	-0.214142	0.235273	0.807234	0.509015	1.28017	0.362726	0.440421
C*03:04	0.0857793	0.0945081	1.08957	0.905329	1.31129	0.364069	0.438817
B*15:18	-0.513862	0.566595	0.598181	0.197032	1.81605	0.364444	0.438369
DQB1*03:05	-0.965571	1.0866	0.380766	0.0452607	3.20327	0.374211	0.426884
A*36:01	-0.504938	0.571259	0.603543	0.19699	1.84916	0.376748	0.423949
C*18:01	0.400712	0.45724	1.49289	0.60928	3.65795	0.380828	0.419272
B*40:02	-0.105869	0.121208	0.899543	0.709329	1.14076	0.382418	0.417461
B*56:01	-0.384841	0.440669	0.680559	0.28692	1.61425	0.382494	0.417376
A*32:01	-0.12091	0.143215	0.886114	0.669241	1.17327	0.398528	0.399541
DRB1*10:01	0.173161	0.20644	1.18906	0.793374	1.78208	0.401582	0.396225
DRB1*15:02	-0.193872	0.231583	0.823763	0.523209	1.29697	0.402501	0.395233
B*44:02	-0.0906865	0.109907	0.913304	0.73631	1.13284	0.409303	0.387955
DRB1*13:04	-0.381826	0.472088	0.682614	0.270599	1.72196	0.418628	0.378171
DQB1*03:04	-0.463516	0.579744	0.629068	0.201934	1.95968	0.42399	0.372645
C*04:01	-0.0517481	0.0648281	0.949568	0.836264	1.07822	0.424734	0.371883
DRB1*01:01	0.0818898	0.103794	1.08534	0.885551	1.33019	0.430131	0.366399
B*45:01	0.139647	0.177011	1.14987	0.81278	1.62676	0.430162	0.366368
DQB1*05:03	0.126153	0.160142	1.13446	0.828843	1.55276	0.430838	0.365686
DRB1*16:01	-0.183742	0.235309	0.83215	0.524691	1.31978	0.434887	0.361623
B*51:08	-0.610937	0.785934	0.542842	0.116325	2.53322	0.436959	0.35956
B*40:20	0.770873	1.00212	2.16165	0.303227	15.4101	0.441748	0.354825
A*68:02	-0.12701	0.16704	0.880724	0.634823	1.22188	0.44704	0.349653
DRB1*03:01	0.064266	0.0860113	1.06638	0.90094	1.26219	0.454954	0.342032
A*02:04	-0.50134	0.671329	0.605718	0.162489	2.25797	0.455192	0.341806
B*53:01	-0.158926	0.213444	0.853059	0.561425	1.29618	0.456525	0.340535
DRB1*14:06	-0.122555	0.167509	0.884657	0.637072	1.22846	0.464393	0.333115
B*81:01	-0.795741	1.09948	0.451247	0.0523016	3.89326	0.469225	0.328619
DRB1*16:02	-0.135589	0.187864	0.873201	0.604229	1.26191	0.470454	0.327483
B*51:14	0.712206	1.00503	2.03848	0.284318	14.6154	0.478549	0.320074
DRB1*15:01	-0.0605129	0.0855449	0.941282	0.79598	1.11311	0.479329	0.319366
C*15:05	-0.224912	0.320324	0.798586	0.426242	1.49619	0.482592	0.31642
B*52:01	-0.117209	0.168058	0.8894	0.639798	1.23638	0.485534	0.313781
DRB1*08:04	-0.218772	0.314154	0.803505	0.434086	1.48731	0.486187	0.313197
A*02:03	1.0086	1.45169	2.74176	0.159339	47.1774	0.487197	0.312296
B*27:05	-0.108051	0.157039	0.897582	0.65978	1.22109	0.49142	0.308547
C*05:01	-0.06674	0.0983064	0.935438	0.771499	1.13421	0.497202	0.303467
B*15:15	-0.203885	0.300599	0.815556	0.452458	1.47004	0.497605	0.303115
DRB1*11:02	-0.172894	0.261019	0.841227	0.504347	1.40313	0.507727	0.294369
B*41:01	0.148635	0.224539	1.16025	0.747171	1.8017	0.507999	0.294137
DRB1*08:02	-0.0649027	0.0996772	0.937159	0.770843	1.13936	0.514964	0.288223
A*30:10	0.417104	0.648692	1.51756	0.425567	5.41157	0.520229	0.283805
B*27:03	0.908784	1.41679	2.4813	0.154413	39.8726	0.521237	0.282964
A*24:25	-0.50079	0.804502	0.606052	0.125229	2.93302	0.533623	0.272765
A*68:07	0.619088	1.00225	1.85723	0.260456	13.2434	0.536774	0.270208
B*38:01	-0.106581	0.175046	0.898902	0.637838	1.26682	0.542608	0.265514
DRB1*04:10	-0.391294	0.670894	0.676181	0.181546	2.51849	0.55973	0.252021
B*47:01	0.280123	0.487748	1.32329	0.508717	3.44219	0.565752	0.247374
B*15:09	-0.457093	0.80634	0.633121	0.130352	3.07508	0.570799	0.243516
A*24:05	0.804671	1.42599	2.23596	0.136658	36.5842	0.572558	0.242181
C*07:04	-0.147867	0.262445	0.862546	0.515685	1.44271	0.573149	0.241732
B*35:10	-0.630275	1.12143	0.532445	0.0591149	4.79571	0.574096	0.241016
B*07:02	0.0474212	0.0846409	1.04856	0.888274	1.23778	0.5753	0.240106
B*55:01	0.119283	0.213942	1.12669	0.740786	1.71362	0.577154	0.238709
DRB1*04:05	-0.0924096	0.166631	0.911732	0.6577	1.26388	0.579185	0.237182
C*05:09	0.76886	1.41475	2.1573	0.134789	34.5278	0.586813	0.231501
A*24:03	-0.282381	0.52011	0.753986	0.272043	2.08973	0.587181	0.231228
B*35:12	-0.107548	0.198189	0.898034	0.608963	1.32432	0.587369	0.231089
DRB1*11:03	-0.195017	0.36008	0.822821	0.406255	1.66652	0.588098	0.23055
A*69:01	0.220977	0.421859	1.24729	0.545602	2.85143	0.600406	0.221555
B*44:05	-0.275109	0.530287	0.759489	0.268616	2.14739	0.603906	0.219031
B*50:02	0.336466	0.651545	1.39999	0.390408	5.02032	0.605566	0.217838
A*26:01	-0.074047	0.143546	0.928628	0.700895	1.23036	0.605965	0.217552
A*68:23	0.725898	1.41763	2.06659	0.128394	33.2631	0.608616	0.215657
DRB1*11:04	0.0660531	0.129881	1.06828	0.828189	1.37798	0.611056	0.213919
C*15:09	0.229448	0.452682	1.25791	0.517985	3.05477	0.612251	0.213071
B*37:01	-0.12703	0.251648	0.880707	0.537804	1.44224	0.613703	0.212041
DRB1*14:02	0.0909055	0.182531	1.09517	0.765784	1.56622	0.618465	0.208685
C*01:02	-0.0559054	0.113267	0.945629	0.757365	1.18069	0.62161	0.206482
B*35:11	0.693704	1.41633	2.00111	0.124642	32.1277	0.624284	0.204618
B*35:30	-0.561035	1.15744	0.570618	0.0590358	5.51539	0.627874	0.202128
A*31:01	0.0554479	0.119125	1.05701	0.836912	1.335	0.641602	0.192734
A*03:02	-0.237464	0.529881	0.788626	0.279143	2.228	0.654048	0.18439
B*39:11	-0.362357	0.819635	0.696034	0.139619	3.4699	0.65842	0.181497
B*40:08	-0.206741	0.48663	0.81323	0.313318	2.11077	0.670952	0.173309
DQB1*05:04	0.381978	0.921501	1.46518	0.24071	8.91842	0.678496	0.168453
A*29:01	0.172474	0.420314	1.18824	0.521346	2.70821	0.681552	0.166501
DRB1*04:06	0.212908	0.518968	1.23727	0.447415	3.42152	0.68162	0.166458
DRB1*12:01	-0.0854574	0.211301	0.918092	0.606769	1.38915	0.685893	0.163744
C*15:04	-0.463597	1.15721	0.629017	0.0651071	6.07711	0.688702	0.161969
B*18:01	-0.0469679	0.117331	0.954118	0.758103	1.20082	0.688933	0.161823
B*57:03	-0.134324	0.336453	0.874307	0.452136	1.69067	0.68972	0.161327
DRB1*13:05	0.149095	0.373667	1.16078	0.558058	2.41447	0.689889	0.16122
B*15:30	-0.192871	0.483567	0.824588	0.319607	2.12744	0.690003	0.161149
B*49:01	-0.0593165	0.150331	0.942408	0.701899	1.26533	0.693159	0.159167
B*39:08	0.235611	0.617903	1.26568	0.377012	4.24907	0.702975	0.15306
C*03:07	-0.439967	1.15614	0.644058	0.066804	6.20936	0.703537	0.152713
B*07:05	0.127528	0.350386	1.13602	0.57165	2.25756	0.715884	0.145157
C*03:05	0.0886485	0.243643	1.0927	0.677807	1.76154	0.715973	0.145103
B*39:02	-0.174548	0.483717	0.839836	0.325422	2.16742	0.718213	0.143747
DRB1*14:04	-0.287659	0.841611	0.750018	0.144105	3.9036	0.732505	0.135189
B*35:14	-0.1787	0.530129	0.836357	0.295894	2.364	0.736051	0.133092
B*35:04	0.30724	0.92053	1.35967	0.223801	8.26045	0.738558	0.131615
A*80:01	0.207064	0.629245	1.23006	0.358346	4.22232	0.742105	0.129535
C*14:02	-0.0675797	0.212572	0.934653	0.616177	1.41774	0.75055	0.12462
A*33:01	-0.0436868	0.166974	0.957254	0.690075	1.32788	0.7936	0.100398
B*42:02	-0.214351	0.820528	0.807065	0.161607	4.03047	0.793911	0.100228
DRB1*04:01	0.0344556	0.135519	1.03506	0.793611	1.34996	0.799304	0.0972883
DQB1*03:01	-0.0147455	0.0581662	0.985363	0.879193	1.10435	0.799877	0.0969768
B*57:01	0.046297	0.186376	1.04739	0.726876	1.50922	0.80382	0.0948414
B*27:02	-0.120501	0.492909	0.886476	0.337361	2.32938	0.806867	0.093198
DRB1*04:04	-0.0277839	0.115528	0.972599	0.775522	1.21976	0.809947	0.0915434
B*44:03	0.022749	0.095373	1.02301	0.848588	1.23328	0.811473	0.0907261
B*35:16	-0.121968	0.537514	0.885176	0.308666	2.53846	0.820492	0.0859257
B*48:01	-0.0391757	0.200637	0.961582	0.648934	1.42486	0.845192	0.0730445
B*15:10	-0.097829	0.537897	0.906804	0.31597	2.60244	0.855682	0.0676874
B*35:02	-0.0354146	0.213319	0.965205	0.635388	1.46622	0.868143	0.0614085
B*39:09	0.143509	0.878621	1.15432	0.206266	6.45985	0.870256	0.0603532
B*15:40	-0.18417	1.17029	0.831795	0.0839152	8.24501	0.874953	0.0580153
A*74:01	-0.0549818	0.36607	0.946502	0.461866	1.93967	0.880611	0.0552159
B*15:39	0.107414	0.733414	1.1134	0.264457	4.68753	0.88356	0.053764
B*40:16	0.123596	0.872103	1.13156	0.204799	6.25211	0.887299	0.0519298
DQB1*06:04	-0.0189284	0.138771	0.98125	0.747576	1.28796	0.891505	0.0498762
A*24:14	-0.158341	1.22902	0.853558	0.076749	9.49278	0.897488	0.0469716
DQB1*04:02	-0.0103017	0.0821885	0.989751	0.842492	1.16275	0.900253	0.0456356
C*03:03	0.0156843	0.125573	1.01581	0.794186	1.29928	0.900601	0.0454677
DRB1*13:03	0.0230648	0.202283	1.02333	0.688383	1.52126	0.90922	0.041331
A*68:01	0.013231	0.117699	1.01332	0.804561	1.27624	0.910495	0.0407225
C*15:06	0.114935	1.22672	1.1218	0.101323	12.42	0.925353	0.0336924
A*30:02	-0.0155441	0.168433	0.984576	0.707744	1.36969	0.926471	0.0331684
B*15:04	0.0641901	0.712225	1.0663	0.264009	4.30661	0.928187	0.0323645
C*12:03	0.00917176	0.116398	1.00921	0.803348	1.26784	0.937194	0.0281704
B*44:10	-11.7183	160.71	8.14378e-06	1.29278e-142	5.13011e+131	0.941873	0.0260075
B*35:28	-11.6444	159.989	8.76762e-06	5.72517e-142	1.34269e+131	0.941979	0.0259589
B*53:04	12.7968	196.968	361069	7.85783e-163	1.65912e+173	0.948199	0.0231007
DRB1*14:11	12.7752	196.968	353351	7.68987e-163	1.62365e+173	0.948286	0.0230607
DRB1*14:41	12.7476	196.968	343712	7.48006e-163	1.57937e+173	0.948398	0.0230095
A*24:22	12.7038	196.968	329003	7.15999e-163	1.51177e+173	0.948575	0.0229285
DRB1*11:01	-0.00744289	0.11584	0.992585	0.790974	1.24558	0.94877	0.022839
A*02:25	12.6384	196.968	308161	6.70647e-163	1.416e+173	0.948839	0.0228074
B*15:02	-11.9275	186.116	6.60622e-06	2.4802e-164	1.75962e+153	0.948902	0.0227788
B*35:23	-11.9514	187.13	6.45034e-06	3.32325e-165	1.25199e+154	0.949076	0.0226989
DRB1*14:07	-11.8038	184.943	7.47625e-06	2.80081e-163	1.99565e+152	0.94911	0.0226833
C*03:08	-11.8698	186.028	6.99861e-06	3.12215e-164	1.56881e+153	0.949124	0.0226769
DRB1*08:03	-0.0294881	0.462436	0.970942	0.392247	2.40341	0.949156	0.0226625
A*02:13	-12.7255	199.883	2.97427e-06	2.13583e-176	4.14185e+164	0.949237	0.0226253
B*51:13	12.5388	196.968	278944	6.07058e-163	1.28175e+173	0.949242	0.0226232
C*08:04	-11.8814	186.766	6.91805e-06	7.27567e-165	6.57802e+153	0.949276	0.0226077
B*35:22	12.5174	196.968	273040	5.9421e-163	1.25462e+173	0.949328	0.0225836
B*27:07	-11.637	183.491	8.83323e-06	5.69523e-162	1.37002e+151	0.949432	0.0225361
DRB1*11:14	12.4864	196.968	264716	5.76103e-163	1.21635e+173	0.949453	0.0225263
DRB1*11:15	12.4746	196.968	261618	5.69351e-163	1.20214e+173	0.949501	0.0225046
A*32:05	12.4432	196.968	253513	5.51724e-163	1.16487e+173	0.949628	0.0224464
B*40:107	12.4216	196.968	248098	5.3994e-163	1.13999e+173	0.949716	0.0224065
C*03:131	12.4216	196.968	248098	5.3994e-163	1.13999e+173	0.949716	0.0224065
C*04:29	12.4107	196.968	245402	5.34059e-163	1.12763e+173	0.94976	0.0223863
DRB1*01:15	12.4107	196.968	245402	5.34059e-163	1.12763e+173	0.94976	0.0223863
C*16:26	12.4	196.968	242803	5.28416e-163	1.11566e+173	0.949803	0.0223666
B*39:24	-11.6826	186.031	8.43971e-06	3.7467e-164	1.90111e+153	0.949927	0.02231
C*03:47	12.3354	196.968	227611	4.95354e-163	1.04585e+173	0.950064	0.0222472
B*15:20	12.3354	196.968	227611	4.95354e-163	1.04585e+173	0.950064	0.0222472
C*04:155	12.3354	196.968	227611	4.95354e-163	1.04585e+173	0.950064	0.0222472
C*08:28	12.3354	196.968	227611	4.95354e-163	1.04585e+173	0.950064	0.0222472
C*16:08	12.3354	196.968	227611	4.95354e-163	1.04585e+173	0.950064	0.0222472
DQB1*03:34	12.3354	196.968	227611	4.95354e-163	1.04585e+173	0.950064	0.0222472
DRB1*13:14	12.2924	196.968	218033	4.74511e-163	1.00184e+173	0.950238	0.0221677
A*24:128	12.2495	196.968	208873	4.54575e-163	9.59749e+172	0.950411	0.0220884
B*18:05	12.2495	196.968	208873	4.54575e-163	9.59749e+172	0.950411	0.0220884
DRB1*04:09	12.2066	196.968	200110	4.35504e-163	9.19485e+172	0.950585	0.0220092
DRB1*13:10	12.2066	196.968	200110	4.35504e-163	9.19485e+172	0.950585	0.0220092
B*44:08	12.2066	196.968	200110	4.35504e-163	9.19485e+172	0.950585	0.0220092
DRB1*13:40	12.1852	196.968	195872	4.2628e-163	9.00011e+172	0.950671	0.0219697
A*03:27	12.1852	196.968	195872	4.2628e-163	9.00011e+172	0.950671	0.0219697
B*50:11	12.1852	196.968	195872	4.2628e-163	9.00011e+172	0.950671	0.0219697
C*06:33	12.1852	196.968	195872	4.2628e-163	9.00011e+172	0.950671	0.0219697
DRB1*03:11	12.1852	196.968	195872	4.2628e-163	9.00011e+172	0.950671	0.0219697
C*03:279	12.1852	196.968	195872	4.2628e-163	9.00011e+172	0.950671	0.0219697
B*51:09	12.0997	196.968	179824	3.91354e-163	8.26275e+172	0.951017	0.0218118
B*07:108	12.0784	196.968	176028	3.83092e-163	8.08833e+172	0.951103	0.0217725
B*13:01	13.6409	223.181	839803	8.87822e-185	7.9438e+195	0.951263	0.0216992
B*35:15	11.9719	196.968	158246	3.44391e-163	7.27131e+172	0.951534	0.0215759
B*73:01	-12.84	212.973	2.65251e-06	1.3708e-187	5.13264e+175	0.951925	0.0213971
C*04:04	13.3219	226.925	610449	4.20097e-188	8.87051e+198	0.953186	0.0208224
B*35:09	13.3954	229.409	656992	3.47259e-190	1.24299e+201	0.953437	0.0207079
B*78:01	13.2654	228.639	576862	1.37987e-189	2.41161e+200	0.953734	0.0205729
B*35:41	13.1889	228.996	534382	6.3413e-190	4.50325e+200	0.954072	0.0204189
DQB1*03:70	-11.2285	196.968	1.32904e-05	2.89237e-173	6.10689e+162	0.95454	0.0202059
B*39:34	-11.2068	196.968	1.35809e-05	2.9556e-173	6.24036e+162	0.954627	0.0201661
A*31:10	-11.1852	196.968	1.38775e-05	3.02016e-173	6.37665e+162	0.954715	0.0201264
C*01:10	-11.1852	196.968	1.38775e-05	3.02016e-173	6.37665e+162	0.954715	0.0201264
B*55:02	-11.1852	196.968	1.38775e-05	3.02016e-173	6.37665e+162	0.954715	0.0201264
C*14:66	-11.0989	196.968	1.51283e-05	3.2924e-173	6.95136e+162	0.955064	0.0199676
B*27:12	-11.0989	196.968	1.51283e-05	3.2924e-173	6.95136e+162	0.955064	0.0199676
A*24:53	-11.0989	196.968	1.51283e-05	3.2924e-173	6.95136e+162	0.955064	0.0199676
C*02:06	-11.0989	196.968	1.51283e-05	3.2924e-173	6.95136e+162	0.955064	0.0199676
B*15:55	-11.0774	196.968	1.54578e-05	3.3641e-173	7.10274e+162	0.955151	0.019928
C*04:07	-11.0774	196.968	1.54578e-05	3.3641e-173	7.10274e+162	0.955151	0.019928
C*02:07	-11.0774	196.968	1.54578e-05	3.3641e-173	7.10274e+162	0.955151	0.019928
B*18:147	-11.0774	196.968	1.54578e-05	3.3641e-173	7.10274e+162	0.955151	0.019928
A*23:05	-11.0774	196.968	1.54578e-05	3.3641e-173	7.10274e+162	0.955151	0.019928
A*32:04	-11.0128	196.968	1.64888e-05	3.58849e-173	7.57645e+162	0.955412	0.0198093
B*15:47	-11.0128	196.968	1.64888e-05	3.58849e-173	7.57645e+162	0.955412	0.0198093
DRB1*15:06	-11.0128	196.968	1.64888e-05	3.58849e-173	7.57645e+162	0.955412	0.0198093
B*07:14	-11.0128	196.968	1.64888e-05	3.58849e-173	7.57645e+162	0.955412	0.0198093
A*02:44	-10.9913	196.968	1.68471e-05	3.66648e-173	7.74111e+162	0.955499	0.0197698
C*07:10	-10.9698	196.968	1.72131e-05	3.74613e-173	7.90927e+162	0.955586	0.0197303
B*51:31	-10.9484	196.968	1.75869e-05	3.82748e-173	8.081e+162	0.955673	0.0196908
C*08:46	-10.9484	196.968	1.75869e-05	3.82748e-173	8.081e+162	0.955673	0.0196908
DRB1*13:36	-10.9269	196.968	1.79686e-05	3.91055e-173	8.25639e+162	0.95576	0.0196513
B*15:11	-10.9269	196.968	1.79686e-05	3.91055e-173	8.25639e+162	0.95576	0.0196513
B*51:05	-10.9269	196.968	1.79686e-05	3.91055e-173	8.25639e+162	0.95576	0.0196513
C*07:17	-10.9269	196.968	1.79686e-05	3.91055e-173	8.25639e+162	0.95576	0.0196513
A*33:05	-10.9269	196.968	1.79686e-05	3.91055e-173	8.25639e+162	0.95576	0.0196513
B*48:12	-10.9054	196.968	1.83584e-05	3.99539e-173	8.43552e+162	0.955846	0.0196119
C*01:27	-10.884	196.968	1.87566e-05	4.08204e-173	8.61846e+162	0.955933	0.0195724
C*04:312	-10.884	196.968	1.87566e-05	4.08204e-173	8.61846e+162	0.955933	0.0195724
A*02:137	-10.884	196.968	1.87566e-05	4.08204e-173	8.61846e+162	0.955933	0.0195724
DQB1*02:03	-10.884	196.968	1.87566e-05	4.08204e-173	8.61846e+162	0.955933	0.0195724
C*07:36	-10.8625	196.968	1.91632e-05	4.17053e-173	8.80529e+162	0.95602	0.019533
B*35:113	-10.8625	196.968	1.91632e-05	4.17053e-173	8.80529e+162	0.95602	0.019533
DRB1*07:11	-10.8625	196.968	1.91632e-05	4.17053e-173	8.80529e+162	0.95602	0.019533
DRB1*03:15	-10.8411	196.968	1.95785e-05	4.26091e-173	8.9961e+162	0.956107	0.0194936
DRB1*03:04	-10.8411	196.968	1.95785e-05	4.26091e-173	8.9961e+162	0.956107	0.0194936
A*02:64	-10.8196	196.968	2.00026e-05	4.35321e-173	9.19099e+162	0.956193	0.0194543
A*29:32	-10.8196	196.968	2.00026e-05	4.35321e-173	9.19099e+162	0.956193	0.0194543
B*35:26	-10.8196	196.968	2.00026e-05	4.35321e-173	9.19099e+162	0.956193	0.0194543
B*54:01	-10.7982	196.968	2.04357e-05	4.44748e-173	9.39002e+162	0.95628	0.0194149
B*51:10	-10.7933	196.968	2.05372e-05	4.46942e-173	9.43696e+162	0.9563	0.0194058
DRB1*14:24	-10.7768	196.968	2.08781e-05	4.54376e-173	9.59331e+162	0.956367	0.0193756
DRB1*13:11	-10.7554	196.968	2.133e-05	4.64209e-173	9.80093e+162	0.956453	0.0193363
A*34:01	-10.734	196.968	2.17915e-05	4.74252e-173	1.0013e+163	0.95654	0.0192969
C*08:10	-10.7126	196.968	2.22628e-05	4.84509e-173	1.02296e+163	0.956626	0.0192576
A*68:15	-10.7126	196.968	2.22628e-05	4.84509e-173	1.02296e+163	0.956626	0.0192576
C*07:15	-10.6912	196.968	2.27442e-05	4.94985e-173	1.04508e+163	0.956713	0.0192184
B*35:24	-10.6912	196.968	2.27442e-05	4.94985e-173	1.04508e+163	0.956713	0.0192184
B*18:03	-10.6698	196.968	2.32359e-05	5.05686e-173	1.06767e+163	0.956799	0.0191791
C*02:19	-10.664	196.968	2.33717e-05	5.0863e-173	1.07393e+163	0.956823	0.0191684
C*06:30	-10.664	196.968	2.33717e-05	5.0863e-173	1.07393e+163	0.956823	0.0191684
B*35:21	-12.8542	237.488	2.61502e-06	1.83623e-208	3.72413e+196	0.956835	0.019163
A*25:03	-10.6484	196.968	2.37381e-05	5.16614e-173	1.09075e+163	0.956886	0.0191398
B*18:11	-10.6271	196.968	2.4251e-05	5.27777e-173	1.11432e+163	0.956972	0.0191006
C*12:20	-10.6057	196.968	2.47749e-05	5.39178e-173	1.13839e+163	0.957059	0.0190614
B*67:02	-10.6057	196.968	2.47749e-05	5.39178e-173	1.13839e+163	0.957059	0.0190614
A*02:334	-10.6057	196.968	2.47749e-05	5.39178e-173	1.13839e+163	0.957059	0.0190614
C*03:09	-10.6057	196.968	2.47749e-05	5.39178e-173	1.13839e+163	0.957059	0.0190614
DRB1*11:08	-10.5995	196.968	2.49293e-05	5.42531e-173	1.14551e+163	0.957084	0.01905
A*02:147	-10.578	196.968	2.54709e-05	5.54317e-173	1.17039e+163	0.957171	0.0190105
A*02:58	-10.578	196.968	2.54709e-05	5.54317e-173	1.17039e+163	0.957171	0.0190105
B*51:22	-10.578	196.968	2.54709e-05	5.54317e-173	1.17039e+163	0.957171	0.0190105
A*24:07	-10.5629	196.968	2.58567e-05	5.62718e-173	1.1881e+163	0.957232	0.0189829
DRB1*08:13	-10.535	196.968	2.6589e-05	5.7865e-173	1.22176e+163	0.957345	0.0189317
DRB1*07:15	-10.5135	196.968	2.7166e-05	5.91207e-173	1.24828e+163	0.957432	0.0188923
B*39:10	-10.4989	196.968	2.75677e-05	5.99951e-173	1.26673e+163	0.957491	0.0188653
B*39:12	-10.4989	196.968	2.75677e-05	5.99951e-173	1.26673e+163	0.957491	0.0188653
DRB1*11:28	-10.4706	196.968	2.83574e-05	6.17135e-173	1.30302e+163	0.957605	0.0188135
A*03:09	-10.4562	196.968	2.87704e-05	6.26123e-173	1.322e+163	0.957664	0.018787
B*27:08	-10.4562	196.968	2.87704e-05	6.26123e-173	1.322e+163	0.957664	0.018787
C*06:08	-10.4348	196.968	2.93912e-05	6.39631e-173	1.35053e+163	0.95775	0.0187478
C*05:04	-12.1108	229.624	5.49977e-06	1.90745e-201	1.58576e+190	0.957938	0.0186628
A*74:03	-12.0276	228.665	5.97719e-06	1.35787e-200	2.63109e+189	0.958051	0.0186112
A*31:09	-12.068	229.517	5.74046e-06	2.45627e-201	1.34158e+190	0.958067	0.0186043
B*78:04	-11.9235	228.044	6.63294e-06	5.0872e-200	8.64836e+188	0.958301	0.018498
B*15:17	0.0162154	0.310552	1.01635	0.552962	1.86805	0.958358	0.0184724
DRB1*14:109	-10.2563	196.968	3.51344e-05	7.64614e-173	1.61444e+163	0.958472	0.0184206
A*02:33	-11.9391	229.411	6.53032e-06	3.4387e-201	1.24015e+190	0.958495	0.0184101
C*14:03	-11.7277	225.803	8.06735e-06	5.00431e-198	1.30052e+187	0.958578	0.0183724
B*35:20	-11.8678	228.503	7.01269e-06	2.1884e-200	2.24721e+189	0.958579	0.0183722
A*02:12	-10.1921	196.968	3.74644e-05	8.15318e-173	1.72151e+163	0.958732	0.0183029
C*07:130	-10.1921	196.968	3.74644e-05	8.15318e-173	1.72151e+163	0.958732	0.0183029
B*27:06	-11.7734	228.052	7.70721e-06	5.82248e-200	1.0202e+189	0.958827	0.0182598
A*02:104	-11.6999	227.161	8.29459e-06	3.59092e-199	1.91595e+188	0.958923	0.0182162
B*39:14	-11.5467	225.558	9.66745e-06	9.70118e-198	9.63384e+186	0.959173	0.0181033
B*15:48	-11.497	224.762	1.016e-05	4.85157e-197	2.12769e+186	0.959204	0.0180889
B*39:03	-11.6614	229.272	8.62044e-06	5.95582e-201	1.24772e+190	0.959435	0.0179844
DRB1*08:11	-11.4686	226.292	1.04532e-05	2.48533e-198	4.39654e+187	0.95958	0.0179188
A*30:01	0.00907394	0.181832	1.00912	0.706582	1.44118	0.9602	0.0176384
A*25:01	0.00965391	0.204287	1.0097	0.676551	1.5069	0.962309	0.0166856
A*26:08	-0.0325431	0.843388	0.967981	0.185336	5.0556	0.96922	0.0135775
A*02:06	0.00537225	0.142329	1.00539	0.760642	1.32888	0.969891	0.0132772
C*02:02	-0.00448606	0.119803	0.995524	0.787179	1.25901	0.97013	0.0131701
B*48:02	0.0247092	0.869167	1.02502	0.186587	5.63094	0.97732	0.00996308
B*44:04	0.003952	1.23252	1.00396	0.0896558	11.2423	0.997442	0.00111251
B*15:07	-0.00168493	1.23205	0.998316	0.0892325	11.169	0.998909	0.000474149

## Sheet: supp8
Supplementary Table 8. Results for association between HLA alleles and three or more systemic vaccine side effects in the discovery cohort (African Americans, N = 940; alleles that passed the significance level P value < 0:05).
HLA allele	estimate	std.error	odds ratio	lower limit	upper limit	p_values	negative log p_values
B*35:01	0.540401	0.20022	1.7167	1.15948	2.5417	0.00695396	2.15777
DQB1*05:01	0.321136	0.140571	1.37869	1.04667	1.81604	0.0223419	1.65088
C*04:01	0.271765	0.128999	1.31228	1.01911	1.68979	0.0351419	1.45417
DRB1*04:02	2.37681	1.16278	10.7704	1.10269	105.199	0.0409466	1.38778
B*58:01	-0.657087	0.322667	0.518359	0.275404	0.975642	0.0417079	1.37978
DRB1*12:01	0.537967	0.26911	1.71252	1.01057	2.90206	0.0456018	1.34102
B*45:01	0.491206	0.248782	1.63429	1.0036	2.66131	0.0483312	1.31577
A*02:60	2.269	1.16314	9.66974	0.989313	94.5139	0.0510853	1.2917
A*02:05	-0.890235	0.480091	0.410559	0.160219	1.05205	0.0636955	1.19589
B*18:01	0.467048	0.270015	1.59528	0.939713	2.70818	0.0836812	1.07737
DRB1*08:04	-0.431295	0.249513	0.649667	0.398383	1.05945	0.0838908	1.07629
C*14:02	-0.883122	0.541404	0.41349	0.143091	1.19486	0.102854	0.987779
A*80:01	0.837205	0.513919	2.3099	0.843601	6.32485	0.1033	0.985899
B*27:05	-1.1704	0.746822	0.310242	0.0717783	1.34094	0.117074	0.931541
B*14:03	1.94745	1.2499	7.01077	0.605102	81.2274	0.119214	0.923673
A*32:01	-0.965868	0.622217	0.380652	0.112431	1.28876	0.12059	0.918688
A*33:03	-0.404502	0.263531	0.667309	0.398112	1.11853	0.124801	0.903783
B*15:16	-0.710001	0.492075	0.491644	0.187408	1.28977	0.149056	0.82665
A*03:01	0.256617	0.183509	1.29255	0.902072	1.85205	0.161996	0.790495
C*16:01	0.251009	0.180094	1.28532	0.903052	1.82941	0.163388	0.78678
DRB1*11:02	0.402173	0.293293	1.49507	0.841406	2.65654	0.170302	0.76878
B*07:05	-1.42327	1.04577	0.240926	0.0310244	1.87096	0.173524	0.760642
DQB1*03:03	-0.735096	0.552221	0.47946	0.16244	1.41518	0.183135	0.737228
C*17:01	-0.309027	0.236077	0.734161	0.462209	1.16612	0.19053	0.720037
B*38:01	0.874809	0.680851	2.39842	0.631499	9.10912	0.198836	0.701506
B*08:01	-0.35279	0.290253	0.702725	0.397848	1.24123	0.224192	0.64938
DQB1*06:04	-0.518749	0.427315	0.595265	0.257616	1.37546	0.224759	0.648284
DRB1*04:03	1.23172	1.01972	3.42711	0.464438	25.2888	0.227085	0.643811
DQB1*06:03	-0.451054	0.375466	0.636956	0.305145	1.32957	0.229627	0.638976
C*05:01	0.357885	0.299844	1.4303	0.794685	2.5743	0.232646	0.633305
C*03:02	-0.487223	0.408509	0.61433	0.27585	1.36814	0.232992	0.632658
B*14:02	-0.531223	0.44553	0.587886	0.245499	1.40778	0.233129	0.632404
DQB1*04:02	-0.287998	0.243654	0.749763	0.465073	1.20872	0.237207	0.624873
B*44:02	0.428199	0.366773	1.53449	0.747758	3.14897	0.243017	0.614362
A*33:01	0.430386	0.369833	1.53785	0.744914	3.17484	0.244533	0.611662
B*44:03	0.277506	0.239531	1.31983	0.825329	2.11063	0.246643	0.607932
B*57:01	-0.878633	0.762591	0.41535	0.0931717	1.85159	0.249252	0.603362
DRB1*08:01	-1.15912	1.05439	0.313762	0.0397272	2.47808	0.271625	0.56603
C*02:02	-0.221696	0.204864	0.801159	0.53621	1.19702	0.27918	0.554115
DRB1*01:03	1.05061	1.00656	2.85939	0.397626	20.5623	0.296594	0.527837
DRB1*01:01	0.300014	0.29639	1.34988	0.755096	2.41316	0.311429	0.506641
B*52:01	-0.498223	0.504379	0.607609	0.226093	1.6329	0.323253	0.490457
DRB1*09:01	0.291233	0.307829	1.33808	0.7319	2.4463	0.344104	0.46331
DRB1*08:06	-1.01341	1.07681	0.362978	0.0439824	2.99558	0.346641	0.460119
C*12:03	0.340364	0.36772	1.40546	0.68361	2.88953	0.354651	0.450199
C*15:05	-0.450902	0.487642	0.637053	0.244955	1.65678	0.355144	0.449596
DRB1*04:04	-0.498873	0.555043	0.607215	0.204588	1.80221	0.368759	0.433257
B*40:01	-0.490671	0.555581	0.612216	0.206056	1.81897	0.377146	0.42349
A*25:01	-0.910823	1.07671	0.402193	0.0487439	3.31856	0.397591	0.400563
C*15:02	-0.814052	1.01579	0.443059	0.0605071	3.24427	0.4229	0.373762
DQB1*03:02	0.19117	0.246286	1.21067	0.747104	1.96186	0.437625	0.358898
C*03:04	-0.197906	0.258775	0.820447	0.494056	1.36246	0.444403	0.352223
DRB1*13:16	1.07865	1.41898	2.94072	0.182221	47.4581	0.447156	0.349541
B*47:01	1.07988	1.44226	2.94432	0.174305	49.735	0.454013	0.342932
DRB1*10:01	-0.318631	0.428869	0.727144	0.313733	1.68532	0.457508	0.339601
B*13:02	-0.561422	0.781037	0.570397	0.123409	2.63639	0.472254	0.325824
A*68:01	-0.225885	0.318476	0.797809	0.427373	1.48933	0.478158	0.320429
B*42:01	-0.184376	0.260754	0.831623	0.498848	1.38639	0.479513	0.319199
A*66:02	0.522023	0.739178	1.68543	0.395832	7.17649	0.480051	0.318713
C*07:01	-0.112758	0.160976	0.893367	0.651635	1.22477	0.483638	0.31548
B*41:03	0.996038	1.43222	2.70753	0.163472	44.8441	0.486774	0.312673
B*15:31	0.996028	1.43935	2.70751	0.161201	45.4749	0.488939	0.310745
B*15:01	0.379706	0.551777	1.46186	0.495704	4.31108	0.491357	0.308603
A*31:01	-0.437394	0.642713	0.645717	0.183212	2.27578	0.49616	0.304378
B*55:01	-0.727904	1.08603	0.48292	0.0574686	4.05807	0.502701	0.29869
DRB1*03:02	-0.168135	0.252285	0.84524	0.515502	1.38589	0.505126	0.296601
DRB1*11:01	0.124844	0.18966	1.13297	0.781226	1.64309	0.510378	0.292108
DRB1*04:05	-0.304607	0.46393	0.737413	0.297034	1.83069	0.511451	0.291196
B*39:06	0.566588	0.873206	1.76224	0.318257	9.75784	0.516429	0.286989
DRB1*07:01	-0.112585	0.178506	0.893521	0.629735	1.2678	0.52823	0.277177
DRB1*11:03	0.893905	1.42707	2.44466	0.149097	40.0836	0.531059	0.274857
B*57:03	0.156159	0.250021	1.16901	0.716138	1.90827	0.532244	0.273889
DRB1*14:01	-0.237062	0.384867	0.788943	0.371057	1.67745	0.537923	0.26928
B*42:02	-0.471312	0.788019	0.624183	0.13321	2.92474	0.549775	0.259815
C*08:02	0.173914	0.29586	1.18995	0.666329	2.12506	0.55665	0.254418
DQB1*05:03	-0.235432	0.407851	0.79023	0.35529	1.75761	0.563771	0.248897
A*36:01	-0.191751	0.332618	0.825513	0.430123	1.58436	0.564285	0.248501
B*58:02	0.156205	0.2725	1.16907	0.685302	1.99432	0.566491	0.246807
A*68:02	0.127409	0.229285	1.13588	0.724706	1.78035	0.578429	0.23775
DRB1*04:01	0.201215	0.366895	1.22289	0.595771	2.51012	0.583399	0.234035
DRB1*11:17	0.77234	1.42003	2.16483	0.133865	35.009	0.586518	0.231719
B*15:10	-0.168337	0.318245	0.845069	0.452894	1.57684	0.596837	0.224144
DQB1*02:01	-0.0649122	0.128395	0.93715	0.728647	1.20532	0.61316	0.212426
B*81:01	-0.233736	0.466712	0.791571	0.317115	1.97589	0.616501	0.210066
A*24:02	0.158733	0.327717	1.17202	0.616564	2.2279	0.628132	0.201949
DRB1*13:03	-0.13945	0.29012	0.869836	0.492587	1.536	0.630756	0.200139
A*02:01	0.0742307	0.155553	1.07706	0.794014	1.46099	0.633217	0.198448
DQB1*05:02	0.135051	0.296745	1.14459	0.639819	2.04761	0.649033	0.187733
B*49:01	-0.148308	0.332963	0.862166	0.448918	1.65583	0.656018	0.183084
DRB1*15:01	0.143879	0.324129	1.15474	0.611761	2.17966	0.657118	0.182356
DRB1*08:02	0.545718	1.2373	1.72585	0.152682	19.5082	0.659174	0.181
B*41:02	-0.482758	1.10217	0.617079	0.0711474	5.35208	0.66138	0.179549
DRB1*01:02	0.115951	0.265051	1.12294	0.667945	1.88787	0.661774	0.17929
A*26:01	0.197196	0.452585	1.21798	0.501641	2.95726	0.663047	0.178456
A*66:01	-0.248487	0.575131	0.77998	0.252652	2.40794	0.665703	0.176719
B*37:01	-0.345623	0.810469	0.707779	0.144548	3.46563	0.669781	0.174067
C*01:02	0.220488	0.536109	1.24669	0.435925	3.56535	0.680871	0.166935
C*18:01	0.109379	0.271337	1.11559	0.655445	1.89876	0.686866	0.163128
B*78:01	0.214999	0.540686	1.23986	0.429666	3.57779	0.690895	0.160588
DRB1*15:02	0.468206	1.23015	1.59713	0.143289	17.8019	0.703494	0.152739
DQB1*06:01	0.468206	1.23015	1.59713	0.143289	17.8019	0.703494	0.152739
DRB1*13:04	0.187416	0.508948	1.20613	0.444804	3.27054	0.712693	0.147097
A*02:02	0.0934845	0.257632	1.09799	0.662673	1.81928	0.716709	0.144657
B*57:04	-0.405379	1.12453	0.666724	0.0735742	6.04181	0.718483	0.143583
B*14:01	0.219872	0.610887	1.24592	0.376263	4.12559	0.718905	0.143329
DRB1*03:01	-0.0678817	0.211968	0.934371	0.616721	1.41563	0.748782	0.125644
DQB1*06:08	0.392551	1.23501	1.48075	0.13159	16.6626	0.750596	0.124594
B*39:10	0.15789	0.509803	1.17104	0.43114	3.18071	0.756782	0.121029
C*07:02	-0.0603865	0.198076	0.941401	0.638512	1.38797	0.760469	0.118919
DRB1*15:03	0.0506376	0.167547	1.05194	0.757482	1.46087	0.762478	0.117773
B*57:02	-0.240785	0.797373	0.78601	0.164699	3.75116	0.762672	0.117662
C*07:04	0.148389	0.492077	1.15996	0.44216	3.04305	0.762991	0.117481
B*27:03	-0.320575	1.12618	0.725732	0.0798276	6.5978	0.775907	0.11019
DRB1*13:02	-0.0577776	0.207261	0.94386	0.628758	1.41688	0.780423	0.10767
A*74:01	0.0640688	0.237009	1.06617	0.670006	1.69657	0.786912	0.104074
A*23:01	0.0456565	0.171388	1.04671	0.748066	1.46459	0.789937	0.102408
B*15:03	0.0585709	0.220381	1.06032	0.688406	1.63316	0.790416	0.102144
B*40:02	-0.28227	1.12515	0.75407	0.0831116	6.84167	0.801913	0.0958727
B*15:17	-0.266196	1.12801	0.766289	0.0839863	6.99161	0.813443	0.0896726
B*51:01	-0.0821518	0.365109	0.921132	0.450334	1.88412	0.821974	0.0851417
DRB1*13:01	-0.0480485	0.228121	0.953088	0.60947	1.49044	0.833178	0.079262
DRB1*16:02	-0.0948248	0.455008	0.909532	0.372827	2.21885	0.834915	0.078358
A*30:04	0.182361	0.876095	1.20005	0.215502	6.6826	0.83511	0.0782561
B*51:09	0.235669	1.22808	1.26576	0.114021	14.0513	0.847821	0.0716959
B*35:03	0.160419	0.842604	1.174	0.225128	6.1222	0.849008	0.0710883
DQB1*03:01	0.0237554	0.143576	1.02404	0.772862	1.35685	0.868586	0.0611871
DQB1*06:09	-0.0467759	0.283821	0.954301	0.547132	1.66448	0.869095	0.0609326
A*30:01	-0.034992	0.216343	0.965613	0.631899	1.47557	0.871508	0.0597284
DQB1*06:02	0.0215622	0.136688	1.0218	0.781652	1.33572	0.874656	0.058163
C*06:02	-0.0260004	0.205636	0.974335	0.65113	1.45797	0.899384	0.0460546
A*30:02	-0.0239277	0.192776	0.976356	0.669135	1.42463	0.901219	0.0451697
DRB1*04:07	-0.0767916	0.826694	0.926083	0.183212	4.68108	0.925991	0.0333932
C*08:04	-0.057067	0.67598	0.944531	0.251079	3.55322	0.932722	0.0302479
DRB1*11:04	-0.0510733	0.678549	0.950209	0.25132	3.59262	0.940001	0.0268716
A*29:02	-0.0241556	0.328385	0.976134	0.512841	1.85796	0.941361	0.0262436
A*11:01	0.0298407	0.432636	1.03029	0.441258	2.40562	0.94501	0.0245635
B*07:02	-0.0124607	0.184578	0.987617	0.687816	1.41809	0.946176	0.0240279
C*16:02	14.6334	373.441	2.2656e+06	0	#NUM!	0.968743	0.0137915
C*03:03	-0.0193259	0.525345	0.98086	0.350287	2.74656	0.970655	0.0129352
B*82:01	14.1064	405.916	1.33765e+06	0	#NUM!	0.972277	0.0122098
A*34:02	0.0106585	0.314881	1.01072	0.545251	1.87353	0.972997	0.0118883
B*44:10	-12.6838	376.041	3.10084e-06	0	#NUM!	0.973093	0.0118459
B*35:02	-12.4146	368.174	4.0587e-06	0	1.00972e+308	0.973101	0.0118422
DRB1*11:10	-12.6817	378.453	3.10748e-06	0	#NUM!	0.973268	0.0117674
B*53:01	0.00530718	0.158715	1.00532	0.736553	1.37216	0.973325	0.0117422
DQB1*02:03	-12.6004	377.925	3.37066e-06	0	#NUM!	0.973403	0.0117075
A*02:04	-12.2531	378.333	4.77046e-06	0	#NUM!	0.974163	0.0113682
DRB1*04:11	-12.2425	378.296	4.82101e-06	0	#NUM!	0.974183	0.0113594
C*14:03	-13.4246	435.478	1.47826e-06	0	#NUM!	0.975407	0.010814
DRB1*12:02	-13.4017	435.599	1.51252e-06	0	#NUM!	0.975456	0.0107923
B*39:01	-13.3298	437.74	1.62531e-06	0	#NUM!	0.975707	0.0106806
B*41:01	-14.6129	512.844	4.50508e-07	0	#NUM!	0.977268	0.0099862
A*23:02	15.0026	535.411	3.27759e+06	0	#NUM!	0.977646	0.00981855
B*14:05	14.9359	535.411	3.06601e+06	0	#NUM!	0.977745	0.00977439
B*44:07	14.8919	535.411	2.9341e+06	0	#NUM!	0.977811	0.00974529
B*39:24	14.8919	535.411	2.9341e+06	0	#NUM!	0.977811	0.00974529
B*50:01	-0.0147189	0.530819	0.985389	0.348149	2.78901	0.977879	0.0097151
C*06:09	14.6569	535.411	2.3197e+06	0	#NUM!	0.978161	0.00958986
C*02:33	14.513	535.411	2.00867e+06	0	#NUM!	0.978375	0.00949465
DRB1*13:27	14.513	535.411	2.00867e+06	0	#NUM!	0.978375	0.00949465
A*29:09	14.3926	535.411	1.78086e+06	0	#NUM!	0.978554	0.00941506
B*56:01	14.3334	535.411	1.67842e+06	0	#NUM!	0.978643	0.00937589
C*12:02	-13.4678	506.767	1.41587e-06	0	#NUM!	0.978798	0.00930691
B*15:18	-13.4452	508.107	1.44812e-06	0	#NUM!	0.978889	0.00926641
DRB1*16:01	-13.4085	508.751	1.50232e-06	0	#NUM!	0.978974	0.00922901
DQB1*06:05	-13.3132	509.233	1.65252e-06	0	#NUM!	0.979143	0.00915398
A*68:67	-12.9851	535.411	2.29423e-06	0	#NUM!	0.980651	0.00848547
A*02:186	-12.9421	535.411	2.39497e-06	0	#NUM!	0.980715	0.00845712
C*02:14	-12.8569	535.411	2.60804e-06	0	#NUM!	0.980842	0.00840089
DQB1*06:11	-12.8569	535.411	2.60804e-06	0	#NUM!	0.980842	0.00840089
DRB1*04:08	-12.8357	535.411	2.66384e-06	0	#NUM!	0.980874	0.00838693
B*40:12	-12.7936	535.411	2.77863e-06	0	#NUM!	0.980937	0.0083591
C*15:30	-12.7936	535.411	2.77863e-06	0	#NUM!	0.980937	0.0083591
A*02:14	-12.7936	535.411	2.77863e-06	0	#NUM!	0.980937	0.0083591
B*18:03	-12.7936	535.411	2.77863e-06	0	#NUM!	0.980937	0.0083591
C*16:04	-12.7936	535.411	2.77863e-06	0	#NUM!	0.980937	0.0083591
A*30:54	-12.7725	535.411	2.83766e-06	0	#NUM!	0.980968	0.00834524
A*68:60	-12.7725	535.411	2.83766e-06	0	#NUM!	0.980968	0.00834524
C*06:32	-12.7725	535.411	2.83766e-06	0	#NUM!	0.980968	0.00834524
DQB1*03:27	-12.7725	535.411	2.83766e-06	0	#NUM!	0.980968	0.00834524
C*04:08	-12.7516	535.411	2.8978e-06	0	#NUM!	0.980999	0.0083314
DRB1*13:31	-12.7516	535.411	2.8978e-06	0	#NUM!	0.980999	0.0083314
C*16:07	-12.7097	535.411	3.02155e-06	0	#NUM!	0.981061	0.00830382
C*04:62	-12.6473	535.411	3.21616e-06	0	#NUM!	0.981154	0.00826266
DRB1*03:56	-12.6473	535.411	3.21616e-06	0	#NUM!	0.981154	0.00826266
A*23:06	-12.5852	535.411	3.42218e-06	0	#NUM!	0.981247	0.00822172
B*18:25	-12.544	535.411	3.56622e-06	0	#NUM!	0.981308	0.00819453
A*29:11	-12.5234	535.411	3.64033e-06	0	#NUM!	0.981339	0.00818097
B*56:02	-12.5234	535.411	3.64033e-06	0	#NUM!	0.981339	0.00818097
DRB1*14:04	-12.5234	535.411	3.64033e-06	0	#NUM!	0.981339	0.00818097
B*48:01	-12.5029	535.411	3.71587e-06	0	#NUM!	0.98137	0.00816743
A*30:10	-12.4565	535.411	3.89249e-06	0	#NUM!	0.981439	0.00813682
A*02:11	-12.4414	535.411	3.95143e-06	0	#NUM!	0.981461	0.00812691
B*40:06	-12.421	535.411	4.03303e-06	0	#NUM!	0.981492	0.00811343
C*08:01	-12.421	535.411	4.03303e-06	0	#NUM!	0.981492	0.00811343
B*51:07	-12.3932	535.411	4.14656e-06	0	#NUM!	0.981533	0.00809513
B*44:126	-12.3598	535.411	4.28751e-06	0	#NUM!	0.981583	0.0080731
C*05:40	-12.3598	535.411	4.28751e-06	0	#NUM!	0.981583	0.0080731
DRB1*14:02	-12.3191	535.411	4.4656e-06	0	#NUM!	0.981643	0.00804627
B*48:06	-12.3094	535.411	4.50896e-06	0	#NUM!	0.981658	0.0080399
C*08:03	-12.3094	535.411	4.50896e-06	0	#NUM!	0.981658	0.0080399
B*27:02	-12.2886	535.411	4.60403e-06	0	#NUM!	0.981689	0.00802615
B*15:67	-12.2677	535.411	4.70095e-06	0	#NUM!	0.98172	0.00801242
B*15:05	-12.2379	535.411	4.84335e-06	0	#NUM!	0.981764	0.00799275
A*33:05	-12.2262	535.411	4.90053e-06	0	#NUM!	0.981782	0.00798502
B*08:09	-12.2176	535.411	4.94251e-06	0	#NUM!	0.981795	0.0079794
B*39:09	-12.1771	535.411	5.14677e-06	0	#NUM!	0.981855	0.00795271
B*40:90	-12.1569	535.411	5.25197e-06	0	#NUM!	0.981885	0.00793938
A*74:03	-12.1433	535.411	5.3238e-06	0	#NUM!	0.981905	0.00793042
C*04:07	-12.0608	535.411	5.78155e-06	0	#NUM!	0.982028	0.00787607
B*51:02	-11.9786	535.411	6.27682e-06	0	#NUM!	0.982151	0.00782192
A*02:06	-11.9581	535.411	6.40688e-06	0	#NUM!	0.982181	0.00780841
A*68:03	-11.8762	535.411	6.95372e-06	0	#NUM!	0.982303	0.00775446
A*68:07	-11.8558	535.411	7.09736e-06	0	#NUM!	0.982334	0.00774099
B*39:08	-11.8558	535.411	7.09736e-06	0	#NUM!	0.982334	0.00774099
A*02:03	-11.8353	535.411	7.24391e-06	0	#NUM!	0.982364	0.00772753
A*24:03	0.00106446	1.23377	1.00107	0.0891776	11.2375	0.999312	0.000299066

## Sheet: supp9
Supplementary Table 9. Results for association between HLA alleles and three or more systemic vaccine side effects in the discovery cohort (Asian Pacific Islanders, N = 2,177; alleles that passed the significance level P value < 0.05).
HLA allele	estimate	std.error	odds ratio	lower limit	upper limit	p_values	negative log p_values
DRB1*14:01	-0.702152	0.245025	0.495518	0.306542	0.800992	0.00416168	2.38073
C*12:02	-0.464283	0.169668	0.628586	0.450755	0.876574	0.00621115	2.20683
DRB1*07:01	0.270555	0.107812	1.31069	1.06103	1.61909	0.0120896	1.91759
DQB1*03:03	0.250175	0.100413	1.28425	1.05481	1.56359	0.012722	1.89544
C*03:02	-0.31437	0.14645	0.730249	0.548037	0.973042	0.0318247	1.49724
C*07:02	-0.19308	0.0900191	0.824416	0.691068	0.983495	0.0319626	1.49536
A*74:01	2.28745	1.10899	9.84983	1.12056	86.581	0.0391469	1.4073
C*08:01	0.232611	0.114635	1.26189	1.00796	1.5798	0.0424436	1.37219
B*58:01	-0.297289	0.146776	0.74283	0.557123	0.990438	0.0428204	1.36835
DRB1*04:10	1.07481	0.538011	2.92943	1.02051	8.40905	0.0457449	1.33966
B*15:25	0.68687	0.345698	1.98748	1.00935	3.91352	0.0469325	1.32853
DRB1*04:02	-1.50009	0.760684	0.223109	0.0502354	0.990888	0.0486058	1.31331
DRB1*09:01	0.217626	0.112024	1.24312	0.99806	1.54836	0.0520563	1.28353
B*50:01	0.652303	0.358288	1.91996	0.951286	3.875	0.0686658	1.16326
B*27:04	-0.688791	0.379521	0.502183	0.238675	1.05662	0.0695404	1.15776
C*06:02	0.216892	0.121796	1.24221	0.978409	1.57714	0.074947	1.12525
B*15:02	0.271013	0.153279	1.31129	0.971014	1.77082	0.0770445	1.11326
B*07:02	-0.361786	0.211387	0.696432	0.460196	1.05394	0.0869913	1.06052
DQB1*02:01	0.162176	0.0963088	1.17607	0.973761	1.4204	0.0921987	1.03528
B*52:01	-0.305668	0.187648	0.736631	0.509942	1.06409	0.103326	0.985792
B*15:35	0.609102	0.379683	1.83878	0.873648	3.8701	0.108662	0.963922
DQB1*04:02	0.385287	0.244292	1.47004	0.910716	2.37287	0.114759	0.940214
B*44:03	0.237885	0.151269	1.26856	0.943082	1.70638	0.115813	0.936244
A*24:07	0.31395	0.199824	1.36882	0.925238	2.02507	0.116152	0.934975
C*03:04	0.174942	0.112613	1.19118	0.955252	1.48537	0.12031	0.919698
C*12:03	-0.3554	0.229246	0.700893	0.447212	1.09847	0.12107	0.916963
DRB1*11:01	0.215686	0.141294	1.24071	0.940588	1.6366	0.126884	0.896592
C*16:02	-0.623432	0.410962	0.536102	0.239568	1.19968	0.129265	0.888519
B*56:04	1.12043	0.760341	3.06618	0.690848	13.6086	0.140591	0.852042
B*57:01	0.308886	0.21219	1.36191	0.89852	2.06427	0.145474	0.837214
C*04:06	-1.52568	1.07544	0.217474	0.0264225	1.78995	0.156	0.806875
B*27:06	-0.806727	0.57258	0.446316	0.145296	1.37098	0.158854	0.799001
A*26:02	0.56312	0.410831	1.75614	0.784972	3.92886	0.170473	0.768346
B*56:03	1.58099	1.16065	4.85977	0.499635	47.2693	0.173146	0.761587
C*08:03	-1.47276	1.08728	0.229291	0.027219	1.93153	0.175566	0.755561
B*48:03	-1.05792	0.795432	0.347176	0.0730237	1.65057	0.183519	0.73632
DRB1*12:02	0.144335	0.108913	1.15527	0.933202	1.43019	0.185092	0.732612
B*15:08	1.20462	0.919051	3.33548	0.550613	20.2055	0.189953	0.721354
DQB1*05:02	-0.144062	0.110958	0.865834	0.696602	1.07618	0.19417	0.711817
C*07:01	0.187403	0.145868	1.20611	0.906197	1.60529	0.198882	0.701405
B*56:01	-0.571677	0.453185	0.564578	0.232255	1.37241	0.207142	0.683732
DRB1*08:01	-1.3557	1.08732	0.257767	0.0305972	2.17156	0.212461	0.672722
A*24:02	-0.106224	0.085458	0.899223	0.760544	1.06319	0.213869	0.669853
C*14:03	0.375309	0.302925	1.45544	0.803785	2.63542	0.215363	0.666828
B*48:01	-0.337389	0.273144	0.713631	0.417801	1.21893	0.216754	0.664033
DQB1*06:02	-0.214361	0.173564	0.807057	0.574333	1.13408	0.21681	0.66392
B*35:05	0.297452	0.241904	1.34642	0.838047	2.16319	0.218837	0.659879
B*51:02	-0.806009	0.656494	0.446637	0.123349	1.61724	0.219541	0.658484
B*15:17	0.550785	0.45083	1.73461	0.716883	4.19718	0.221816	0.654007
C*17:01	0.932568	0.767013	2.54102	0.565086	11.4262	0.224044	0.649666
B*35:02	-1.31585	1.11402	0.268246	0.0302174	2.38128	0.237536	0.62427
B*40:01	-0.130979	0.114917	0.877237	0.700321	1.09884	0.254384	0.59451
B*15:05	0.82445	0.728595	2.28063	0.546841	9.51145	0.257819	0.588685
B*27:07	1.03508	0.916373	2.81533	0.467193	16.9653	0.258671	0.587252
DRB1*15:02	-0.118787	0.10621	0.887996	0.721113	1.0935	0.263388	0.579405
A*03:01	0.211669	0.191048	1.23574	0.849775	1.79701	0.267887	0.572048
DRB1*13:01	-0.227639	0.206486	0.796412	0.53134	1.19372	0.27027	0.568202
DQB1*06:10	1.35198	1.23168	3.86505	0.345721	43.2101	0.272351	0.564871
DRB1*14:04	-0.229219	0.211185	0.795154	0.525639	1.20286	0.277747	0.55635
A*34:05	1.34519	1.24111	3.83891	0.337094	43.7186	0.278428	0.555286
A*31:01	0.197485	0.182893	1.21834	0.851304	1.74361	0.280239	0.552472
A*24:03	0.446533	0.421734	1.56288	0.683817	3.57202	0.289689	0.538067
A*26:03	-1.13998	1.07679	0.319827	0.0387552	2.63936	0.289747	0.537982
DRB1*08:02	0.347994	0.335687	1.41622	0.733482	2.73448	0.299892	0.523035
C*15:02	-0.156321	0.152344	0.855285	0.634502	1.15289	0.304842	0.515926
DRB1*11:04	-0.425274	0.424574	0.65359	0.284381	1.50214	0.316513	0.499608
B*07:05	-0.24114	0.242589	0.785732	0.488403	1.26407	0.320211	0.494564
DRB1*04:06	0.231031	0.232843	1.2599	0.798243	1.98854	0.321092	0.49337
A*02:10	0.910486	0.919815	2.48553	0.409691	15.0793	0.322244	0.491815
DRB1*08:09	-1.1026	1.11546	0.332007	0.0372949	2.9556	0.322922	0.490902
B*52:04	1.2026	1.23778	3.32875	0.294211	37.6621	0.331263	0.479827
B*35:03	-0.212399	0.219955	0.808642	0.525445	1.24447	0.334222	0.475965
DRB1*01:01	-0.196344	0.205582	0.821729	0.549204	1.22949	0.339545	0.469102
A*24:17	0.59301	0.621818	1.80943	0.534859	6.12129	0.340249	0.468203
B*15:32	1.16325	1.2314	3.20033	0.286423	35.7586	0.344832	0.462392
A*02:06	0.145242	0.157026	1.15632	0.849992	1.57304	0.354988	0.449787
B*51:07	-1.00961	1.10493	0.364363	0.0417833	3.17735	0.360858	0.442664
B*18:01	0.267628	0.29389	1.30686	0.734625	2.32484	0.362484	0.440712
DQB1*06:03	-0.184156	0.202504	0.831806	0.559303	1.23708	0.363143	0.439923
B*51:06	-0.432067	0.478949	0.649166	0.253902	1.65976	0.366996	0.435338
B*45:01	0.651088	0.725645	1.91763	0.462469	7.95143	0.369583	0.432288
DRB1*01:02	1.11353	1.24828	3.04508	0.26366	35.1685	0.372366	0.42903
C*14:02	0.147682	0.16582	1.15914	0.837507	1.6043	0.373135	0.428135
A*24:10	0.540517	0.611877	1.71689	0.517491	5.69619	0.377034	0.42362
DQB1*03:02	-0.107603	0.123242	0.897984	0.705281	1.14334	0.382606	0.417248
A*29:01	-0.257296	0.297476	0.773139	0.43156	1.38508	0.387077	0.412203
C*05:01	0.317995	0.369795	1.37437	0.665776	2.83713	0.389831	0.409123
A*03:02	-0.700229	0.816188	0.496471	0.100263	2.45837	0.390933	0.407897
A*11:01	-0.0693597	0.0812534	0.932991	0.795634	1.09406	0.393314	0.40526
B*39:01	-0.263221	0.314586	0.768572	0.414862	1.42386	0.402749	0.394965
B*49:01	-0.495966	0.599377	0.608982	0.188107	1.97154	0.407971	0.389371
B*38:02	-0.141397	0.172094	0.868145	0.619587	1.21641	0.411291	0.385851
B*13:02	0.191255	0.234121	1.21077	0.765197	1.91579	0.413981	0.38302
DRB1*15:06	-0.553336	0.680924	0.575028	0.151382	2.18426	0.416433	0.380455
DRB1*15:01	-0.0962739	0.119577	0.908215	0.718461	1.14809	0.420749	0.375977
B*59:01	0.422897	0.529881	1.52638	0.540279	4.31227	0.424813	0.371802
B*18:02	-0.646918	0.83134	0.523657	0.102659	2.67115	0.436473	0.360043
DQB1*04:01	-0.115966	0.14974	0.890505	0.664011	1.19426	0.438665	0.357867
DRB1*11:06	-0.638598	0.826599	0.528032	0.104483	2.66855	0.439782	0.356762
B*13:01	0.127561	0.165202	1.13605	0.821819	1.57044	0.440024	0.356524
B*15:01	0.130375	0.170662	1.13926	0.815362	1.59181	0.444906	0.351732
DRB1*13:12	-0.505632	0.663488	0.603125	0.164299	2.21401	0.446012	0.350654
A*30:04	0.765703	1.00538	2.15051	0.299737	15.4291	0.446297	0.350376
DQB1*06:04	-0.208234	0.274342	0.812017	0.474286	1.39024	0.447834	0.348883
A*24:20	-0.849228	1.12426	0.427745	0.0472274	3.87415	0.45003	0.346758
B*44:02	0.276009	0.366675	1.31786	0.642317	2.70389	0.451608	0.345238
C*04:03	0.157718	0.210261	1.17084	0.775386	1.76797	0.453192	0.343718
DQB1*05:03	-0.108255	0.145357	0.897399	0.674925	1.19321	0.456422	0.340633
B*15:12	0.422572	0.574101	1.52588	0.495263	4.70116	0.461695	0.335645
B*27:05	-0.332602	0.459346	0.717055	0.29144	1.76423	0.469018	0.328811
C*15:04	-0.80472	1.13071	0.447213	0.0487564	4.10202	0.476656	0.321795
DRB1*04:08	0.478254	0.689197	1.61326	0.417875	6.22816	0.487726	0.311824
B*40:06	0.109119	0.160167	1.11529	0.814803	1.52661	0.495695	0.304786
DRB1*04:03	-0.116108	0.188095	0.890379	0.615836	1.28731	0.537048	0.269987
B*40:02	0.114732	0.18633	1.12157	0.778431	1.61597	0.538064	0.269166
DRB1*14:07	0.507071	0.833345	1.66042	0.324236	8.50306	0.542871	0.265303
B*41:01	0.386498	0.638796	1.47182	0.420823	5.14764	0.545151	0.263483
B*47:01	-0.671263	1.13271	0.511063	0.0554999	4.70605	0.553438	0.256931
DRB1*10:01	0.103567	0.174823	1.10912	0.787346	1.5624	0.553577	0.256822
B*14:01	0.595233	1.00911	1.81345	0.250921	13.1062	0.555284	0.255485
DQB1*05:12	0.834767	1.42668	2.30428	0.140644	37.7528	0.558473	0.252998
C*01:02	0.0540473	0.0930618	1.05553	0.879542	1.26674	0.561397	0.25073
B*55:07	-0.676562	1.16881	0.508362	0.0514355	5.02439	0.562692	0.249729
A*26:01	-0.100519	0.178777	0.904368	0.637041	1.28388	0.573939	0.241134
C*15:05	-0.176771	0.315357	0.837972	0.45164	1.55477	0.57511	0.240249
B*39:05	-0.471078	0.846711	0.624329	0.118762	3.28207	0.577963	0.2381
DRB1*04:05	-0.0704006	0.136498	0.93202	0.713241	1.21791	0.60602	0.217513
DQB1*06:01	-0.0493812	0.0963961	0.951818	0.787953	1.14976	0.608459	0.215769
DRB1*15:04	0.419331	0.825522	1.52094	0.301588	7.67029	0.611482	0.213616
B*67:01	0.29231	0.58376	1.33952	0.426621	4.20586	0.616557	0.210027
DRB1*14:06	0.325531	0.65578	1.38477	0.38297	5.00711	0.61961	0.207881
C*16:04	0.740229	1.519	2.09641	0.106778	41.1597	0.626035	0.203401
DQB1*05:01	-0.05839	0.120348	0.943282	0.745074	1.19422	0.627551	0.202351
A*33:03	-0.049886	0.104659	0.951338	0.774903	1.16794	0.633608	0.198179
B*48:04	-0.561776	1.18262	0.570195	0.0561509	5.79016	0.634768	0.197385
B*08:01	0.128308	0.271824	1.1369	0.667332	1.93689	0.636909	0.195923
DQB1*03:05	0.664968	1.41964	1.94443	0.120328	31.4209	0.639495	0.194163
DRB1*04:04	-0.159494	0.340882	0.852575	0.437087	1.66302	0.639866	0.193911
DRB1*03:01	-0.065239	0.139955	0.936844	0.71209	1.23253	0.641113	0.193065
A*30:02	-0.395056	0.852793	0.673642	0.126624	3.58378	0.643185	0.191664
C*12:09	0.446893	0.966711	1.56345	0.235073	10.3984	0.643879	0.191196
A*02:20	0.462767	1.01418	1.58846	0.217617	11.5947	0.648175	0.188307
DQB1*03:01	0.0351543	0.0824786	1.03578	0.881171	1.21752	0.669946	0.17396
A*24:135	0.60008	1.4155	1.82226	0.113687	29.2086	0.671614	0.17288
DRB1*14:03	-0.28855	0.683917	0.749349	0.19612	2.86317	0.673092	0.171926
B*14:02	-0.502712	1.1918	0.604888	0.0585051	6.25398	0.673165	0.171879
A*02:01	0.0466354	0.111012	1.04774	0.842865	1.30241	0.674418	0.171071
DRB1*14:12	0.589579	1.43661	1.80323	0.10794	30.1245	0.681516	0.166524
C*07:29	0.570737	1.44418	1.76957	0.104366	30.0038	0.692696	0.159457
A*02:11	-0.109431	0.276939	0.896344	0.520882	1.54245	0.692735	0.159433
C*08:02	0.309446	0.783433	1.36267	0.29344	6.32793	0.692853	0.159359
C*04:01	0.0426578	0.113625	1.04358	0.835231	1.3039	0.707343	0.15037
B*15:13	-0.22948	0.615116	0.794947	0.23809	2.65421	0.709098	0.149294
C*06:27	0.543356	1.45791	1.72178	0.0988496	29.9901	0.709376	0.149123
B*15:06	0.53306	1.46277	1.70414	0.0969112	29.9665	0.715545	0.145363
DRB1*15:03	0.533054	1.46997	1.70413	0.095551	30.3927	0.716883	0.144552
DRB1*13:02	-0.0615203	0.172421	0.940334	0.670679	1.31841	0.721239	0.141921
A*32:01	-0.0998287	0.284996	0.904992	0.517669	1.58212	0.726128	0.138987
C*12:04	0.189016	0.542076	1.20806	0.417508	3.49553	0.727322	0.138273
C*03:88	-0.426051	1.22973	0.653083	0.0586405	7.27343	0.728999	0.137273
A*02:16	0.3151	0.920643	1.3704	0.225517	8.32747	0.732155	0.135397
C*07:04	-0.102226	0.307679	0.902825	0.493972	1.65008	0.7397	0.130944
B*15:27	-0.152656	0.467086	0.858425	0.343645	2.14434	0.743799	0.128544
B*15:21	-0.108485	0.345478	0.897192	0.455836	1.76588	0.75351	0.122911
B*46:01	0.0393486	0.126344	1.04013	0.811975	1.3324	0.755466	0.121785
C*02:02	-0.137531	0.511604	0.871508	0.319731	2.37551	0.788066	0.103437
A*02:03	-0.04967	0.187271	0.951543	0.659205	1.37353	0.790832	0.101916
A*02:07	0.038639	0.14569	1.0394	0.781208	1.38291	0.790845	0.101909
C*03:03	0.0371665	0.143185	1.03787	0.783898	1.37411	0.795195	0.0995261
B*39:09	-0.316322	1.22752	0.728825	0.0657258	8.08185	0.796645	0.0987351
B*51:01	0.033583	0.137387	1.03415	0.790021	1.35373	0.80689	0.0931859
A*02:05	0.104705	0.466292	1.11038	0.445202	2.76942	0.822331	0.0849532
DQB1*06:09	0.0497133	0.224378	1.05097	0.677011	1.63149	0.824656	0.0837272
B*15:75	-0.260705	1.24243	0.770508	0.0674832	8.79749	0.833797	0.0789395
B*37:01	0.0489441	0.235862	1.05016	0.661433	1.66735	0.835611	0.0779961
A*34:01	0.0449518	0.22436	1.04598	0.673819	1.62368	0.841202	0.0750995
B*55:02	-0.0539959	0.274959	0.947436	0.552714	1.62405	0.844314	0.0734959
B*40:10	0.279407	1.42436	1.32235	0.0810777	21.5669	0.844483	0.0734092
A*11:02	-0.0494764	0.264257	0.951728	0.566987	1.59754	0.851481	0.0698249
A*25:01	0.230211	1.2658	1.25887	0.10532	15.047	0.855684	0.0676864
B*15:18	0.0591144	0.325563	1.0609	0.560465	2.00816	0.855915	0.0675691
B*55:01	0.0593199	0.34209	1.06111	0.542712	2.0747	0.862333	0.0643248
A*29:02	0.143154	0.89067	1.15391	0.20138	6.61187	0.872309	0.0593295
DRB1*08:03	-0.0242024	0.153786	0.976088	0.722078	1.31945	0.874948	0.058018
A*30:01	0.0337812	0.265712	1.03436	0.614458	1.7412	0.898834	0.0463205
DRB1*16:02	0.024451	0.202439	1.02475	0.689128	1.52384	0.903863	0.0438972
B*54:01	0.0237554	0.198417	1.02404	0.694098	1.51082	0.904701	0.0434947
A*23:01	0.0470594	0.419319	1.04818	0.460793	2.38435	0.910642	0.0406521
B*15:11	0.0489706	0.448786	1.05019	0.435766	2.53094	0.913109	0.0394774
B*39:15	-0.134006	1.26172	0.874584	0.0737568	10.3705	0.915416	0.0383813
B*15:07	0.0828287	0.847761	1.08636	0.206226	5.7227	0.922168	0.0351898
B*81:01	0.128609	1.41574	1.13725	0.0709175	18.2371	0.927618	0.0326309
A*68:01	0.0183309	0.216083	1.0185	0.66685	1.55559	0.932394	0.0304005
DRB1*12:01	-0.0173356	0.210345	0.982814	0.650762	1.4843	0.934317	0.0295059
DRB1*08:18	-0.0985662	1.22852	0.906136	0.0815565	10.0676	0.936053	0.0286996
DRB1*04:01	-0.0271069	0.386061	0.973257	0.456673	2.07419	0.944023	0.0250173
C*07:26	13.5001	224.324	729500	8.20811e-186	6.48347e+196	0.952011	0.0213579
B*35:01	0.00983682	0.16483	1.00989	0.731082	1.39501	0.952412	0.0211753
B*44:05	13.032	220.293	456793	1.38811e-182	1.50319e+193	0.952827	0.0209861
B*53:01	-13.0747	230.616	2.09764e-06	1.04171e-202	4.22393e+190	0.954788	0.0200929
C*01:03	12.7555	229.496	346436	1.54528e-190	7.76675e+200	0.955676	0.0196893
DRB1*14:18	-11.9903	223.397	6.20418e-06	4.30123e-196	8.94903e+184	0.957196	0.0189991
B*35:08	-12.29	229.569	4.59731e-06	1.77749e-201	1.18905e+190	0.957305	0.0189495
C*01:08	-11.7946	228.646	7.54506e-06	1.77878e-200	3.20038e+189	0.95886	0.0182449
C*02:08	-11.5077	224.906	1.00524e-05	3.62085e-197	2.79077e+186	0.959193	0.0180942
DRB1*14:15	-11.6039	229.125	9.13043e-06	8.42325e-201	9.89698e+189	0.959609	0.0179058
DRB1*15:14	-11.4456	229.569	1.06959e-05	4.13205e-201	2.76867e+190	0.960236	0.0176219
B*40:03	-13.253	266.815	1.755e-06	1.3392e-233	2.29989e+221	0.960384	0.0175549
DRB1*13:03	-11.3407	229.626	1.188e-05	4.10119e-201	3.44129e+190	0.960611	0.0174526
DRB1*16:01	-12.5522	260.843	3.53724e-06	3.27364e-228	3.82208e+216	0.961619	0.0169968
DRB1*04:07	-12.5164	262.447	3.66602e-06	1.46094e-229	9.19936e+217	0.961962	0.0168419
DRB1*14:05	0.0115508	0.264323	1.01162	0.602587	1.69829	0.965144	0.0154079
A*69:01	-13.2708	305.274	1.72418e-06	2.41048e-266	1.23328e+254	0.965326	0.0153262
B*15:38	13.9632	324.744	1.15916e+06	4.33225e-271	3.1015e+282	0.965703	0.0151562
B*45:02	13.925	324.744	1.11574e+06	4.16999e-271	2.98533e+282	0.965797	0.0151141
A*24:78	13.6212	324.744	823387	3.07736e-271	2.20307e+282	0.966543	0.0147788
C*16:26	13.6212	324.744	823387	3.07736e-271	2.20307e+282	0.966543	0.0147788
DRB1*08:39	13.6212	324.744	823387	3.07736e-271	2.20307e+282	0.966543	0.0147788
B*15:29	13.5287	324.744	750658	2.80554e-271	2.00848e+282	0.96677	0.0146768
C*12:05	13.5287	324.744	750658	2.80554e-271	2.00848e+282	0.96677	0.0146768
DRB1*11:11	-12.6715	306.472	3.13937e-06	4.19721e-267	2.34814e+255	0.96702	0.0145646
DRB1*08:04	13.3949	324.744	656655	2.45421e-271	1.75696e+282	0.967098	0.0145293
DRB1*11:03	13.3761	324.744	644420	2.4085e-271	1.72421e+282	0.967145	0.0145086
A*03:13	13.3381	324.744	620366	2.3186e-271	1.65985e+282	0.967238	0.0144666
C*16:01	13.3001	324.744	597234	2.23215e-271	1.59796e+282	0.967331	0.0144248
A*25:02	13.3001	324.744	597234	2.23215e-271	1.59796e+282	0.967331	0.0144248
B*54:23	13.1863	324.744	533012	1.99213e-271	1.42612e+282	0.967611	0.0142994
C*08:46	13.1863	324.744	533012	1.99213e-271	1.42612e+282	0.967611	0.0142994
DQB1*05:15	13.1485	324.744	513216	1.91815e-271	1.37316e+282	0.967704	0.0142577
A*11:15	13.1106	324.744	494173	1.84697e-271	1.3222e+282	0.967796	0.014216
B*50:02	13.1106	324.744	494173	1.84697e-271	1.3222e+282	0.967796	0.014216
C*07:15	13.0729	324.744	475853	1.7785e-271	1.27319e+282	0.967889	0.0141744
A*34:02	13.0351	324.744	458227	1.71263e-271	1.22603e+282	0.967982	0.0141328
A*11:43	12.9221	324.744	409247	1.52956e-271	1.09497e+282	0.968259	0.0140083
B*15:206	12.9221	324.744	409247	1.52956e-271	1.09497e+282	0.968259	0.0140083
DRB1*04:23	12.9221	324.744	409247	1.52956e-271	1.09497e+282	0.968259	0.0140083
DRB1*14:02	12.9221	324.744	409247	1.52956e-271	1.09497e+282	0.968259	0.0140083
DQB1*03:13	12.9221	324.744	409247	1.52956e-271	1.09497e+282	0.968259	0.0140083
A*31:02	12.7717	324.744	352119	1.31604e-271	9.42126e+281	0.968628	0.0138428
C*03:258	-12.6676	324.744	3.15156e-06	1.17788e-282	8.43239e+270	0.968884	0.0137282
A*02:128	12.6592	324.744	314645	1.17598e-271	8.41864e+281	0.968905	0.013719
DQB1*03:11	12.5843	324.744	291932	1.09109e-271	7.81095e+281	0.969089	0.0136365
A*31:12	12.5468	324.744	281205	1.05099e-271	7.52394e+281	0.969181	0.0135953
A*68:02	12.5468	324.744	281205	1.05099e-271	7.52394e+281	0.969181	0.0135953
C*07:27	-12.5156	324.744	3.6691e-06	1.37132e-282	9.81704e+270	0.969257	0.0135609
B*40:63	-12.4776	324.744	3.81092e-06	1.42432e-282	1.01965e+271	0.96935	0.0135192
DRB1*15:41	-12.4776	324.744	3.81092e-06	1.42432e-282	1.01965e+271	0.96935	0.0135192
DQB1*03:26	-12.4776	324.744	3.81092e-06	1.42432e-282	1.01965e+271	0.96935	0.0135192
B*39:06	12.472	324.744	260928	9.75207e-272	6.98145e+281	0.969364	0.013513
DRB1*04:59	12.472	324.744	260928	9.75207e-272	6.98145e+281	0.969364	0.013513
A*24:08	-12.4397	324.744	3.95809e-06	1.47933e-282	1.05903e+271	0.969443	0.0134775
B*40:127	-12.4397	324.744	3.95809e-06	1.47933e-282	1.05903e+271	0.969443	0.0134775
DRB1*04:13	12.4346	324.744	251350	9.39405e-272	6.72518e+281	0.969456	0.0134719
A*33:18	-12.4019	324.744	4.11083e-06	1.53642e-282	1.09989e+271	0.969536	0.0134359
C*03:28	-12.4019	324.744	4.11083e-06	1.53642e-282	1.09989e+271	0.969536	0.0134359
DRB1*13:07	12.3972	324.744	242125	9.04927e-272	6.47838e+281	0.969548	0.0134307
C*14:12	-12.3262	324.744	4.43382e-06	1.65714e-282	1.18631e+271	0.969722	0.0133527
A*02:204	-12.3262	324.744	4.43382e-06	1.65714e-282	1.18631e+271	0.969722	0.0133527
C*01:32	-12.3262	324.744	4.43382e-06	1.65714e-282	1.18631e+271	0.969722	0.0133527
DRB1*14:22	-12.2885	324.744	4.60453e-06	1.72094e-282	1.23198e+271	0.969815	0.0133112
B*15:141	-12.2885	324.744	4.60453e-06	1.72094e-282	1.23198e+271	0.969815	0.0133112
C*14:18	-12.213	324.744	4.96556e-06	1.85588e-282	1.32858e+271	0.97	0.0132282
A*33:01	-12.1753	324.744	5.15637e-06	1.9272e-282	1.37963e+271	0.970093	0.0131867
DQB1*06:21	-12.1753	324.744	5.15637e-06	1.9272e-282	1.37963e+271	0.970093	0.0131867
C*08:16	-12.1753	324.744	5.15637e-06	1.9272e-282	1.37963e+271	0.970093	0.0131867
A*11:32	-12.0999	324.744	5.55995e-06	2.07803e-282	1.48761e+271	0.970278	0.0131039
A*11:06	-12.0999	324.744	5.55995e-06	2.07803e-282	1.48761e+271	0.970278	0.0131039
C*15:17	-12.048	324.744	5.85629e-06	2.18874e-282	1.56694e+271	0.970405	0.0130469
A*11:24	-12.048	324.744	5.85629e-06	2.18874e-282	1.56694e+271	0.970405	0.0130469
DRB1*11:02	-12.01	324.744	6.0828e-06	2.2734e-282	1.62754e+271	0.970498	0.0130052
A*02:317	-11.987	324.744	6.22446e-06	2.32639e-282	1.66541e+271	0.970555	0.0129799
B*27:73	-11.987	324.744	6.22446e-06	2.32639e-282	1.66541e+271	0.970555	0.0129799
DRB1*15:31	-11.9494	324.744	6.46298e-06	2.41553e-282	1.72923e+271	0.970647	0.0129386
B*40:160	-11.9494	324.744	6.46298e-06	2.41553e-282	1.72923e+271	0.970647	0.0129386
DQB1*06:43	-11.9494	324.744	6.46298e-06	2.41553e-282	1.72923e+271	0.970647	0.0129386
B*15:88	-11.9494	324.744	6.46298e-06	2.41553e-282	1.72923e+271	0.970647	0.0129386
A*02:12	-11.9494	324.744	6.46298e-06	2.41553e-282	1.72923e+271	0.970647	0.0129386
B*55:03	-11.9494	324.744	6.46298e-06	2.41553e-282	1.72923e+271	0.970647	0.0129386
A*24:194	-11.9494	324.744	6.46298e-06	2.41553e-282	1.72923e+271	0.970647	0.0129386
C*03:154	-11.9494	324.744	6.46298e-06	2.41553e-282	1.72923e+271	0.970647	0.0129386
DQB1*03:34	-11.9494	324.744	6.46298e-06	2.41553e-282	1.72923e+271	0.970647	0.0129386
B*35:30	-11.9342	324.744	6.56189e-06	2.45246e-282	1.75572e+271	0.970685	0.0129219
B*40:26	-11.9118	324.744	6.71054e-06	2.50806e-282	1.79547e+271	0.97074	0.0128973
B*15:09	-11.9118	324.744	6.71054e-06	2.50806e-282	1.79547e+271	0.97074	0.0128973
A*26:15	-11.8743	324.744	6.9675e-06	2.6041e-282	1.86422e+271	0.970832	0.012856
DQB1*03:102	-11.8743	324.744	6.9675e-06	2.6041e-282	1.86422e+271	0.970832	0.012856
A*33:71	-11.8585	324.744	7.07801e-06	2.64536e-282	1.89381e+271	0.97087	0.0128387
DRB1*03:19	-11.8585	324.744	7.07801e-06	2.64536e-282	1.89381e+271	0.97087	0.0128387
DRB1*11:08	-11.8367	324.744	7.23423e-06	2.70378e-282	1.93559e+271	0.970924	0.0128147
B*40:23	-11.8207	324.744	7.35084e-06	2.74733e-282	1.96681e+271	0.970963	0.0127972
C*04:10	-11.8207	324.744	7.35084e-06	2.74733e-282	1.96681e+271	0.970963	0.0127972
B*07:18	-11.7829	324.744	7.63402e-06	2.85317e-282	2.04258e+271	0.971056	0.0127556
B*39:04	-11.7829	324.744	7.63402e-06	2.85317e-282	2.04258e+271	0.971056	0.0127556
C*02:43	-11.7829	324.744	7.63402e-06	2.85317e-282	2.04258e+271	0.971056	0.0127556
A*02:131	-11.7829	324.744	7.63402e-06	2.85317e-282	2.04258e+271	0.971056	0.0127556
DQB1*05:76	-11.7829	324.744	7.63402e-06	2.85317e-282	2.04258e+271	0.971056	0.0127556
DRB1*11:05	-11.7616	324.744	7.79847e-06	2.91466e-282	2.08656e+271	0.971108	0.0127322
DRB1*04:09	-11.7451	324.744	7.92796e-06	2.96303e-282	2.12122e+271	0.971149	0.0127142
DRB1*13:50	-11.7451	324.744	7.92796e-06	2.96303e-282	2.12122e+271	0.971149	0.0127142
DQB1*04:15	-11.724	324.744	8.09679e-06	3.02615e-282	2.16639e+271	0.971201	0.012691
B*56:02	-11.7074	324.744	8.23306e-06	3.07706e-282	2.20286e+271	0.971242	0.0126727
B*40:07	-11.6865	324.744	8.40647e-06	3.14188e-282	2.24925e+271	0.971293	0.0126498
DRB1*03:02	-11.649	324.744	8.72794e-06	3.26203e-282	2.33526e+271	0.971385	0.0126086
B*39:02	-11.649	324.744	8.72794e-06	3.26203e-282	2.33526e+271	0.971385	0.0126086
A*11:104	-11.649	324.744	8.72794e-06	3.26203e-282	2.33526e+271	0.971385	0.0126086
DQB1*03:37	-11.649	324.744	8.72794e-06	3.26203e-282	2.33526e+271	0.971385	0.0126086
DRB1*14:19	-11.6319	324.744	8.87848e-06	3.31829e-282	2.37555e+271	0.971427	0.0125898
A*31:06	-11.5364	324.744	9.76775e-06	3.65062e-282	2.61349e+271	0.971661	0.0124851
DRB1*16:08	-11.5364	324.744	9.76775e-06	3.65062e-282	2.61349e+271	0.971661	0.0124851
B*51:18	-11.5188	324.744	9.94161e-06	3.71562e-282	2.66e+271	0.971705	0.0124657
B*39:10	-11.5188	324.744	9.94161e-06	3.71562e-282	2.66e+271	0.971705	0.0124657
C*12:28	-11.5188	324.744	9.94161e-06	3.71562e-282	2.66e+271	0.971705	0.0124657
DRB1*08:38	-11.4058	324.744	1.11308e-05	4.16008e-282	2.9782e+271	0.971982	0.0123417
B*15:58	-11.4058	324.744	1.11308e-05	4.16008e-282	2.9782e+271	0.971982	0.0123417
B*51:08	-11.3681	324.744	1.15578e-05	4.31966e-282	3.09245e+271	0.972075	0.0123004
C*03:09	-11.3681	324.744	1.15578e-05	4.31966e-282	3.09245e+271	0.972075	0.0123004
B*15:15	-11.3681	324.744	1.15578e-05	4.31966e-282	3.09245e+271	0.972075	0.0123004
B*55:04	-11.3489	324.744	1.17828e-05	4.40367e-282	3.15269e+271	0.972122	0.0122793
B*41:02	-11.3489	324.744	1.17828e-05	4.40367e-282	3.15269e+271	0.972122	0.0122793
DRB1*01:03	-11.3489	324.744	1.17828e-05	4.40367e-282	3.15269e+271	0.972122	0.0122793
A*11:04	-11.3305	324.744	1.20011e-05	4.48533e-282	3.21105e+271	0.972167	0.0122591
DRB1*15:13	-11.3114	324.744	1.22332e-05	4.57197e-282	3.27321e+271	0.972214	0.0122381
A*02:02	-10.9544	324.744	1.74802e-05	6.53298e-282	4.67715e+271	0.97309	0.0118468
A*23:02	-10.8793	324.744	1.88451e-05	7.04305e-282	5.04238e+271	0.973275	0.0117644
B*38:01	0.00814489	0.517488	1.00818	0.365631	2.77992	0.987442	0.00548824

## Sheet: supp10
Supplementary Table 10. Results for association between HLA-A*03:01 and three or more systemic vaccine side effects with different self-reported ancestries in discovery cohort (N = 57,938).
		European
Side effects	odds ratio	lower limit	upper limit	p-values
No side effects	0.737	0.705	0.769	5.82534e-43
Fever or chills	1.435	1.383	1.489	1.37082e-81
Fatigue	1.253	1.209	1.3	5.57749e-34
Muscle or body aches	1.305	1.258	1.355	2.16843e-45
Headaches	1.237	1.188	1.289	1.00374e-24
Congestion or runny nose	1.25	1.139	1.37	2.25946e-06
Nausea or vomiting	1.386	1.271	1.509	8.80993e-14
Other	1.1	1.02	1.184	0.0121386
		African Americans
Side effects	odds ratio	lower limit	upper limit	p-values
No Side Effects	1.02651	0.716048	1.45276	0.884426
Fever or chills	1.16127	0.802601	1.65734	0.417566
Fatigue	1.4931	1.07178	2.08661	0.0181104
Muscle or body aches	0.956239	0.686133	1.32959	0.790428
Headaches	1.24056	0.821847	1.83079	0.289515
Congestion or runny nose	1.15302	0.555327	2.14843	0.676431
Nausea or vomiting	1.09887	0.419612	2.38372	0.82845
Other	1.00022	0.439844	1.97696	0.999535
		Hispanic
Side effects	odds ratio	lower limit	upper limit	p-values
No Side Effects	0.724029	0.603089	0.864051	0.000427
Fever or chills	1.44934	1.25077	1.67859	7.53e-07
Fatigue	1.32792	1.14927	1.53536	0.000123
Muscle or body aches	1.4132	1.21934	1.64062	4.87e-06
Headaches	1.22576	1.04202	1.43773	0.0131
Congestion or runny nose	1.25134	0.88527	1.72159	0.185
Nausea or vomiting	1.66456	1.18004	2.29359	0.00257
Other	0.9317	0.678484	1.24937	0.649
		Asian Pacific Islanders
Side effects	odds ratio	lower limit	upper limit	p-values
No Side Effects	1.00666	0.632247	1.54453	0.976664
Fever or chills	1.21925	0.847067	1.74999	0.282803
Fatigue	1.11668	0.776362	1.61385	0.553278
Muscle or body aches	1.08121	0.751368	1.56903	0.676726
Headaches	1.17122	0.754254	1.76639	0.464732
Congestion or runny nose	0.682091	0.167372	1.81867	0.514902
Nausea or vomiting	1.68774	0.65551	3.56971	0.217289
Other	0.521906	0.127503	1.40188	0.270927

[truncated: 13 more sheets: supp11, supp12, supp13, supp14, supp15, supp16, supp17, supp18, supp19, supp20, supp21, supp22, supp23]
